# Supplementary material for: The relationship between age of coital debut and HIV seroprevalence among women in Durban, South Africa: a cohort study
Source: PubMed Central journal article supplement — BMJ Open. 2012 Jan 5;2(1):e000285. doi: 10.1136/bmjopen-2011-000285 (PMC3253418; doi:10.1136/bmjopen-2011-000285), 2012-01-05

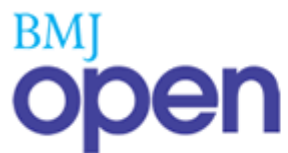

**Lack of education and early age of coital debut are strongly associated with increased HIV seroprevalence in a cohort of women in Durban, South Africa**

|                                 |                                                                                                                                                                               |
|---------------------------------|-------------------------------------------------------------------------------------------------------------------------------------------------------------------------------|
| Journal:                        | <i>BMJ Open</i>                                                                                                                                                               |
| Manuscript ID:                  | bmjopen-2011-000285                                                                                                                                                           |
| Article Type:                   | Research                                                                                                                                                                      |
| Date Submitted by the Author:   | 02-Aug-2011                                                                                                                                                                   |
| Complete List of Authors:       | Wand, Handan; University of New South wales<br>Whitaker, Claire; HIV Prevention Unit, Medical Research Council<br>Ramjee, Gita; HIV Prevention Unit, Medical Research Council |
| <b>Primary Subject Heading</b>: | Infectious diseases                                                                                                                                                           |
| Keywords:                       | Epidemiology < ONCOLOGY, PUBLIC HEALTH, STATISTICS & RESEARCH METHODS                                                                                                         |
|                                 |                                                                                                                                                                               |

SCHOLARONE™  
Manuscripts

only

1  
2  
3  
4  
5  
6  
7  
8  
9  
10  
11  
12  
13  
14

# Lack of education and early age of coital debut are strongly associated with increased HIV seroprevalence in a cohort of women in Durban, South Africa

15 Handan Wand<sup>1</sup>, Claire Whitaker<sup>2</sup> and Gita Ramjee<sup>2</sup>  
16  
17

18 **Page count (including references, tables and figures): 19**  
19

20 **Word count – Text: 3,514 ; Abstract: 257 Tables: 2**  
21  
22  
23  
24

25 <sup>1</sup> Kirby Institute, University of New South Wales, Australia  
26

27 <sup>2</sup> HIV Prevention Research Unit, Medical Research Council, Durban, South Africa,  
28  
29  
30  
31  
32  
33  
34  
35  
36  
37  
38  
39  
40  
41  
42  
43  
44  
45  
46  
47  
48  
49  
50  
51  
52  
53  
54  
55  
56  
57  
58  
59  
60

1  
2  
3  
4 **Abstract:**  
5  
6

7 **Background:** Young women are at high risk for HIV infection in many parts of the world, but  
8 particularly in South Africa. We aimed to investigate the association between early age at first  
9 sex and lack of education on HIV seroprevalence.  
10  
11

12  
13  
14 **Method:** This cross sectional study used demographic, sexual behavior, biologic risk factors and  
15 HIV seroconversion results from 3,492 women who were screened for the Methods for  
16 Improving Reproductive Health in Africa (MIRA) trial from Durban were included in the current  
17 study. Univariate and multivariate logistic regression models were used to determine  
18 independent predictors of HIV seropositivity at the screening visit. Trends in key risk factors for  
19 HIV infection were investigated by age at sexual debut.  
20  
21

22  
23  
24 **Results:** Overall HIV prevalence in this study population was 39%. Early age at sexual debut  
25 was significantly associated with increased HIV seropositivity. Not completing high school, lack  
26 of cohabitation, a higher number of lifetime partners and diagnosis with HSV2 and sexually  
27 transmitted infections (STIs) were also determined to be the independent predictors for HIV  
28 infection at the screening visit. The highest rates of all these risk factors were observed in the  
29 lowest quintiles of age at sexual debut compared to the higher quintiles ( $P_{\text{trend}} < 0.001$  all).  
30  
31

32  
33  
34 **Conclusion:** The association of HIV status with younger age at sexual debut was likely due to an  
35 increased number of lifetime partners. This increase could result from longer duration of sexual  
36 life. Prevention of HIV infection should include efforts to delay age at first sex in young  
37 women.  
38  
39  
40  
41  
42  
43  
44  
45  
46  
47  
48  
49  
50  
51  
52  
53  
54  
55  
56  
57  
58  
59  
60

## INTRODUCTION

Forty percent of all adult women living with HIV reside in southern Africa [1]. In many Southern African countries more than 30% of young women are infected with HIV [2, 3]. Adolescent and young women may be especially prone to HIV infection in comparison with older women due to the occurrence of larger areas of cervical ectopy in young women and an increased likelihood of trauma to the immature genital tract during sex [4, 5]. Early age at sexual debut has been shown to correlate with subsequent risky sexual behaviors [6, 7].

Early sexual debut (commonly defined as having had first sexual intercourse at or before age 14) and experience of sexual coercion or violence have been reported to contribute unintended adolescent pregnancy [8, 9]. In South Africa, data from a nationally representative household survey of young people showed that 7.8% of women aged 15-24 had had sexual intercourse by age 14, and risk of HIV infection was significantly raised if a woman had been sexually active for more than 12 months at the time of the survey [2].

Age at first sex is an important indicator of sexual risk, as it can be used as a proxy for the onset of exposure to HIV infection [10]. Early sexual debut has been associated with increased sexual risk-taking behavior, such as having multiple partners and decreased contraceptive and condom use, and with incidence of sexually transmitted infections [7, 11]. Another study has shown an association between having sex at an early age and incidence of HIV infection in Malawi [12]. Delaying sexual debut may have been one of the key changes in behavior which lead to a decline in HIV infection in Uganda [13, 14].

1  
2  
3  
4  
5  
6 There is also particular interest in the role of schooling in sexual risk behaviors [10, 15]. The  
7  
8 association between level of schooling completed and sexual debut is complex. Although a  
9  
10 woman's level of education may be an indicator of socio-economic status, poor socio-economic  
11  
12 conditions limiting school access or contributing to poor performance may also correlate with an  
13  
14 increase in sexual activity at an early age. In Tanzania, an analysis of the relationship between  
15  
16 education level and HIV prevalence has indicated a steep decline over time in HIV infection  
17  
18 among people who had a secondary education; of particular interest, the lowest HIV prevalence  
19  
20 was found in young women (15-24 years) who had attended secondary school [16]. Overall, a  
21  
22 decline in HIV prevalence over time in the most educated group was seen [16]. Earlier meta-  
23  
24 analysis of education and HIV prevalence data from across sub-Saharan Africa showed that the  
25  
26 relationship between education and risk of HIV infection has changed over time, with more  
27  
28 educated individuals initially at higher risk, and with a later shift of risk towards the less  
29  
30 educated, the inflection point being around 1996 [17]. Higher education levels are hypothesized  
31  
32 to affect the risk of HIV infection through effects on self-efficacy to use prevention technologies,  
33  
34 empowerment, and greater exposure to HIV prevention messages [17].  
35  
36  
37  
38  
39  
40  
41  
42

43  
44 In an attempt to better understand the risk factors that may increase South African women's risk  
45  
46 of HIV infection, we first determined the independent risk factors and their population level  
47  
48 impact on HIV infection and then investigated the association between age at sexual debut,  
49  
50 schooling and other key risk factors for HIV infection in a cohort of sexually active women in  
51  
52 rural and semi-rural neighborhoods of Durban.  
53  
54  
55  
56  
57  
58  
59  
60

## **METHODS:**

### *Study Population:*

A total of 3,492 sexually active women who consented to screening for Methods for Improving Reproductive Health in Africa (MIRA) trial of the diaphragm for HIV prevention [18] (September 2002-September 2005; undertaken in Umkomaas and Botha's Hill, southern Durban) were included in this study. The MIRA study was a randomised controlled open-label study comparing the effectiveness of the latex diaphragm plus lubricant gel with provision of condoms alone for prevention of heterosexual HIV acquisition among women. The methodology for the MIRA study has previously been published [18]. Eligibility criteria included: being sexually active; between 18 and 49 years old; HIV negative; *Chlamydia trachomatis* and *Neisseria gonorrhoeae* negative at the screening visit (or willing to be treated if positive); not pregnant and willing to follow the study protocol requirements. All women provided written informed consent at screening.

### *Study procedures*

At screening, an interviewer-administered questionnaire covering topics on demographics and sexual behaviour was undertaken. Participants were also offered HIV pre-test counselling before HIV and STI testing at the screening visit. HIV diagnostic testing was accomplished using two rapid tests on whole blood from either finger-prick or venipuncture: Determine HIV-1/2 (Abbott Laboratories, Tokyo, Japan) and Oraquick (Orasure Technologies, Bethlehem, PA, USA). Those found to be HIV infected were referred to appropriate referral clinics for HIV care. A urine specimen was collected for testing for *Neisseria gonorrhoea*, *Chlamydia trachomatis* and

1  
2  
3 *Trichomonas vaginalis* infections, and a blood specimen for syphilis and HSV2 testing. STI  
4 testing was completed using the following methodologies: *Chlamydia* and gonorrhoea were  
5 assessed using PCR (Roche Pharmaceuticals, Branchburg, NJ, USA); syphilis by rapid plasma  
6 reagin (RPR) in combination with *Treponema pallidum* haemagglutination (TPHA) (Randox  
7 Laboratories, Crumlin, UK); HSV2 by ELISA (FOCUS Diagnostics, Cypress, CA, USA); and  
8 *Trichomonas vaginalis* by PCR (Roche Pharmaceuticals, Branchburg, NJ, USA).  
9  
10  
11  
12  
13  
14  
15  
16  
17  
18  
19

20 The MIRA study protocol was reviewed and approved by the University of California at San  
21 Francisco Institutional Review Board Committee on Human Research. The study received  
22 ethical approval from the Biomedical Research Ethics Committee of the University of KwaZulu-  
23 Natal, as well as the ethics review committees at all other local institutions and collaborating  
24 organisations. This study is registered with ClinicalTrials.gov, number NCT00121459.  
25  
26  
27  
28  
29  
30  
31  
32  
33

### 34 *Measurements*

35  
36 The primary outcome was proportion of women who tested positive for HIV infection at the  
37 screening visit. Among covariates under consideration: age (<25, 25-34, 35+), education level  
38 <12 years (less than high school), employed/earning income (yes/no), cohabitation status  
39 (single/not cohabitating vs. married/cohabiting), condom used (during last seven days at  
40 baseline; yes/no), using any contraception (yes/no), frequency of sex acts (last seven days),  
41 diagnosis with HSV2 and STIs (*Chlamydia*, gonorrhoea, syphilis or *Trichomonas vaginalis*)  
42 (baseline). Current study only used the available data.  
43  
44  
45  
46  
47  
48  
49  
50  
51  
52  
53  
54

### 55 *Statistical Analyses*

1  
2  
3 Univariate and multivariate analyses of risk factors associated with HIV infection were assessed  
4 using logistic regression, taking the HIV serostatus as the primary outcome. The total study  
5 population was ranked by age at sexual debut and divided into quintiles. The relationships  
6 between demographic, sexual risk behaviors and quintiles of age at sexual debut were  
7 investigated. Prevalence of HIV seropositivity, HSV2 and STIs were also assessed across the  
8 quintiles of age at first sexual debut. Tests for linear trend were conducted by using the chi-  
9 square test.  
10  
11  
12  
13  
14  
15  
16  
17  
18  
19  
20  
21

22 To assess effect modification we performed stratified analyses and evaluated the statistical  
23 significance of multiplicative interaction terms by comparing the  $-2$  log-likelihood statistics of  
24 the main effect model and the model including the interaction term. All P values are two-sided  
25 and significance set at the 0.05 level.  
26  
27  
28  
29  
30  
31  
32  
33

### 34 *Population Attributable Risk*

35  
36 The population attributable risk (PAR) and 95% confidence interval (CI) were calculated to  
37 estimate the population level impact of the risk factors associated with HIV infection [19]  
38  
39  
40  
41  
42

## 43 **Results**

44  
45 A total of 3,492 women consented to be screened for the MIRA trial from Durban clinical  
46 research sites. The median age was 26 (inter-quartile range (IQR): 22-33), and the majority of  
47 women (96%) reported speaking Zulu at home. Only 26% of the women had completed 12 years  
48 of schooling. Approximately 86% were either single or not living with their sexual partners. The  
49 median age at sexual debut was 17 (IQR: 16-18) (data not shown). Overall prevalence of HIV  
50  
51  
52  
53  
54  
55  
56  
57  
58  
59  
60



1  
2  
3 infection, STIs (Chlamydia, gonorrhoea or syphilis) and HSV2 were 39%, 16% and 72%  
4  
5 respectively (data not shown).  
6  
7  
8  
9

### 10 *Risk factors for HIV seropositivity*

11  
12 Table 1 presents univariate and multivariate logistic regression results. Age at the screening visit  
13 had an inverted U-shape association with risk of HIV seropositivity: compared to the youngest  
14 group (i.e. <25 years old), those aged 25-29 years showed increased risk (OR: 1.52, 95% CI:  
15 1.23, 1.87) and those aged 35 or older showed decreased risk for HIV infection. The first four  
16 quintiles of age at sexual debut were consistently associated with increased HIV seropositivity.  
17  
18 Less than high school education, a higher number of lifetime sexual partners and lack of  
19 cohabitation, being diagnosed with HSV2 and STIs were all determined to be independent  
20 predictors for HIV seroconversion.  
21  
22  
23  
24  
25  
26  
27  
28  
29  
30  
31  
32  
33

### 34 *Characteristics of women by quintiles of age at sexual debut*

35  
36 Table 2 presents the distribution of various demographic characteristics, sexual behaviors and  
37 biological risk factors according to the quintiles of age at sexual debut. Significant associations  
38 were found between age at sexual debut and key sexual risk behaviors. There was a linear  
39 decreasing trend observed between the proportion of women who had less than high school  
40 education and age at first sex ( $P_{\text{trend}} < 0.001$ ). For example, compared with the oldest age at first  
41 sexual debut (>20 years), those women in the earliest age at first sexual debut quintile (<15  
42 years) were less likely to have completed high school (62% vs. 86%, p-value for trend <0.001).  
43  
44 Women were similar in terms of religion across the quintiles of the age at first sex ( $P_{\text{trend}} =$   
45 0.827). A slightly higher proportion of women reported speaking Zulu at home in the earlier  
46  
47  
48  
49  
50  
51  
52  
53  
54  
55  
56  
57  
58  
59  
60

1  
2  
3 quintiles of the age at first sex compared with the higher quintiles ( $P_{\text{trend}} = 0.037$ ). Women who  
4  
5 initiated sexual activity at an early age were more likely to report not living with their husband or  
6  
7 sexual partners compared to those who were older. With regard to the number of sexual partners  
8  
9 during their lifetime, early initiators were significantly more likely to have had multiple partners  
10  
11 over their lifetimes (having at least four lifetime sex partners;  $P_{\text{trend}} < 0.001$ ). However, other  
12  
13 sexual risk behaviors such as proportion of women using any contraception or using condoms as  
14  
15 their main form of contraception, and frequency of sexual intercourse were similar across the  
16  
17 quintiles ( $P_{\text{trend}} = 0.784$  and  $P_{\text{trend}} = 0.347$  respectively). The proportion of women who tested  
18  
19 positive for HIV infection, STIs and HSV2 was the highest among those who had early onset  
20  
21 sexual activity ( $P_{\text{trend}} < 0.001$ , all).  
22  
23  
24  
25  
26  
27  
28

29 Table 3 presents the proportion of HIV infections attributable to the independent predictors for  
30  
31 HIV infection. Delaying age at sexual debut accounted for 26% (95% CI: 21%, 31%) of the HIV  
32  
33 infections. If all the participants had completed at least high school education, 13% (95% CI:  
34  
35 10%, 17%) of the HIV infections could theoretically be prevented. Not cohabiting with a sexual  
36  
37 partner and reporting at least four or more lifetime sexual partners accounted for 39% (95% CI:  
38  
39 35%, 43%) and 41% (95% CI: 39%, 43%) of the cases respectively. Diagnosis with HSV2  
40  
41 accounted for 82% (95% CI: 80%, 83%) of the HIV cases while STIs accounted for only 5%  
42  
43 (95% CI: 4%, 6%) of the cases. The high prevalence and high odds ratio (OR) of HSV2 and  
44  
45 relatively low prevalence and low OR of STIs were responsible for these impacts among women.  
46  
47  
48  
49  
50  
51  
52

### 53 Discussion:

54  
55  
56  
57  
58  
59  
60

1  
2  
3 Not surprisingly, key independent predictors for HIV seropositivity included early initiation of  
4 sex, less than high school education, lack of cohabitation, diagnosis with HSV2 and STIs. An  
5  
6 inverse association was found between having less than high school education and increasing  
7  
8 quintiles of age at sexual debut. Our results showed that women who initiated sexual activity  
9  
10 early were more likely to engage in risky sexual behaviours and a clear trend emerged indicating  
11  
12 that early onset sexual activity was associated with increased HIV infection, STIs and HSV2,  
13  
14 higher number of lifetime sexual partners and lower education level. The strong association  
15  
16 between higher number of lifetime sexual partners and decreased age at sexual debut (also noted  
17  
18 for young men in rural South Africa by Harrison et al [20]) is important because a higher number  
19  
20 of partners, particularly concurrent partners, is believed to play a critical role in the spread of  
21  
22 HIV [21, 22].  
23  
24  
25  
26  
27  
28  
29  
30  
31

32 Several studies have found a correlation between early onset of sexual activity and higher HIV  
33  
34 prevalence among young people, who may not be biologically or psychologically ready for sex  
35  
36 [23, 24]. In fact, increasing age at first sex appears to be one contributing factor to declines in  
37  
38 HIV prevalence among youth in sub-Saharan countries with generalized epidemics [14, 25]; each  
39  
40 year of delay in sexual debut has been found to increase the chances that a condom would be  
41  
42 used at debut by 1.44 times, which in turn increased the chances of subsequent consistent use  
43  
44 substantially (among young men in Kenya) [26].  
45  
46  
47  
48  
49  
50

51 The proportion of women who had less than high school education was 86% in the lowest  
52  
53 quintile of age at sexual debut, compared to 76-62% across other quintiles ( $P_{\text{trend}} < 0.001$ ). Early  
54  
55 age at sexual debut and not completing high school were also determined to be independent  
56  
57  
58  
59  
60

1  
2  
3 predictors for HIV infection in multivariate analysis. Although impact of schooling on age at  
4 sexual debut is undoubtedly a complex phenomenon [6], the current study presents clear  
5 evidence of an inverse association between these two factors (ie. the older a woman is at sexual  
6 debut, the less likely it is that she will have less than high school education) and their strong  
7 association with HIV infection. The relationship between lack of education, early sexual debut  
8 and HIV risk may be indicative of a social milieu in which young women are made vulnerable to  
9 HIV infection through interacting factors, with poverty or depressed socio-economic status [27]  
10 as one of a number of mediating forces. A number of authors have analysed the relationship  
11 between educational attainment and risk of HIV infection, and an emerging dynamic pattern  
12 indicates that the correlation differs according to the stage of the epidemic in the country in  
13 question [16, 17, 28, 29] – the highest risk shifts from populations with higher to lower  
14 educational levels as the epidemic progresses. In the South African context in particular, recent  
15 evidence shows that higher levels of education are protective [30], in agreement with our  
16 findings.  
17  
18  
19  
20  
21  
22  
23  
24  
25  
26  
27  
28  
29  
30  
31  
32  
33  
34  
35  
36  
37  
38

39 This study is exploratory, raising questions about the dynamics of women's vulnerability and  
40 sexual risk. Lack of education may indeed be the key factor and pathway to risk among women  
41 with early sexual debut, although we could not determine the direction of the association.  
42 However, recent data from northern Malawi appears to indicate that early sexual debut may lead  
43 to school drop-out since girls were viewed as "ready for marriage" [31]. Whatever the reasons,  
44 these findings highlight a troubling lack of preparation for sexual activity among women in this  
45 setting. Further research should be directed toward better understanding young women's early  
46 relationships and sexual experiences, and to the design of interventions for pre-adolescent young  
47  
48  
49  
50  
51  
52  
53  
54  
55  
56  
57  
58  
59  
60

1  
2  
3 women and men, before sexual debut. Interventions for young women should start in late  
4 primary (10-12 years old) [32] or early high school (13-15 years old) to emphasize condom  
5 promotion, as well as delay in sexual activity. Reaching young women prior to sexual debut is  
6 important since it has been shown that better outcomes may be expected from programmes  
7 which establish protective behaviours, rather than attempting to change existing behaviour  
8 patterns [33]. A “life-skills orientation” programme addressing HIV prevention education  
9 (among other needs) was intended to be fully implemented in South African high schools by  
10 2005, and thus the women in this study may not have directly benefited from this intervention.  
11 The need for this programme to be fully and urgently implemented is also supported by  
12 decreases in the age of sexual debut in later birth cohorts and increases in risky behavior found in  
13 a study conducted among rural South Africans aged 14-35 years during the period 2001-2004  
14 [34]. Continued assessment of the impact of the life skills orientation programme on HIV  
15 protective behaviours and especially biological outcomes among young people will be necessary  
16 for an effective tailored response to the epidemic – early research indicated that the programme  
17 had positive effects on reported condom use among adolescents in two centres in KwaZulu-  
18 Natal, but that other effects were at best modest [35]. Also of concern in light of this is evidence  
19 from a large scale prevention/education programme in Tanzania which found no effect on HIV  
20 or STI prevalence, although changes in behavior were reported [36].  
21  
22  
23  
24  
25  
26  
27  
28  
29  
30  
31  
32  
33  
34  
35  
36  
37  
38  
39  
40  
41  
42  
43  
44  
45  
46  
47

48 Delay of sexual debut is an important tactic in HIV prevention among youth, resulting in fewer  
49 years at high risk. Sexual health education programmes may have positive impacts on delay of  
50 sexual debut and other protective and risk taking behaviours among young people, with several  
51 found to have an enduring effect [37], but the delivery of such programmes in schools mired in  
52  
53  
54  
55  
56  
57  
58  
59  
60

1  
2  
3 highly patriarchal and didactic contexts severely undermines their usefulness [38]. Effective  
4  
5 school-based HIV prevention education is likely to require wholesale structural changes to the  
6  
7 educational system in the countries most affected by the HIV epidemic. However, it can be  
8  
9 conclusively stated that "abstinence-only" programs, which promote complete sexual abstinence  
10  
11 as the only effective method for preventing unintended pregnancy and sexually transmitted  
12  
13 infections including HIV, have not been demonstrated to reduce risk of HIV infection as  
14  
15 assessed by self reported outcomes [39]. Recommended instead are comprehensive sexual  
16  
17 education programs that include sex education and information on abstinence, delay of sexual  
18  
19 debut, partner number limitation, condom use, contraception and empowerment of young  
20  
21 women.  
22  
23  
24  
25  
26

#### 27 28 *Potential limitations of study*

29  
30 Several limitations need to be borne in mind when considering the interpretation of our results:  
31  
32 the nature of the research conducted required that the population selected have an established  
33  
34 moderate-to-high risk of HIV infection. Current study was cross sectional and only used the data  
35  
36 from those who were screened for the study. The study population may have limited  
37  
38 representativeness. We cannot rule out the effects of unmeasured characteristics such as multiple  
39  
40 or concurrent sex partners and commercial sex on our findings. No data concerning migration,  
41  
42 socio-economic status at the time of sexual debut, or sexual behavior data from male partners  
43  
44 were collected or included in these analyses. We could not determine whether young women  
45  
46 were in school at the time of sexual debut.  
47  
48  
49  
50

#### 51 52 53 54 **Conclusion**

1  
2  
3 Our results indicate that a theory-based, contextually appropriate HIV/STD risk-reduction  
4 programme may be important in shaping the sexual behavior of young adolescents before or at  
5 the beginning of their sexual lives. Particularly, efforts to delay sexual debut should be  
6 incorporated into comprehensive sexual education programs and should begin early, offering  
7 age-appropriate messages over time. Comprehensive sexual education programs are typically  
8 targeted towards youth and are predominately school-based. Opportunities to reach out-of-school  
9 youth, who may be at heightened vulnerability, should be identified as well. These programs  
10 may include messages such as reinforcing safer sex practices for young people who are already  
11 sexually active.  
12  
13  
14  
15  
16  
17  
18  
19  
20  
21  
22  
23  
24  
25  
26

## 27 **ARTICLE SUMMARY:**

### 28 **Article focus:**

- 29 • Early sexual debut and experience of sexual coercion may increase women's  
30 vulnerability to HIV infection.  
31
- 32 • Early sexual debut has been associated with increased sexual risk-taking behavior, such  
33 as having multiple partners and decreased contraceptive and condom use, and with  
34 incidence of sexually transmitted infections.  
35
- 36 • Delaying sexual debut may have been one of the key changes in behavior which lead to a  
37 decline in HIV infection in the past.  
38  
39  
40  
41  
42  
43  
44  
45  
46  
47  
48  
49

### 50 **Key Messages:**

- 51 • Our results showed that women who initiated sexual activity early were more likely to  
52 engage in risky sexual behaviours.  
53  
54  
55  
56  
57  
58  
59  
60

- A clear trend observed indicating that early onset sexual activity was associated with increased HIV infection, STIs and HSV2.
- Comprehensive sexual education programs should reach out-of-school youth, who may be at heightened vulnerability, should be identified as well.

**Limitations and Strengths:**

- Current study was cross sectional and only used the data from those who were screened for the study.
- We cannot rule out the effects of unmeasured characteristics such as multiple or concurrent sex partners and commercial sex on our findings. No data concerning migration, socio-economic status at the time of sexual debut, or sexual behavior data from male partners
- Nevertheless, current study used the data from the region where the HIV epidemic is severely high among particularly young women.

**Funding statement:**

This research received no specific grant from any funding agency in the public, commercial or not-for-profit sectors.

**Competing interest:** none declared.

**Competing interests:** The authors declare that they have no competing interests.

**Authors' contributions:** GR was the principal investigator of the MIRA Durban clinical research sites. HW performed the statistical analysis. GR, HW and CW interpreted and drafted the manuscript. All authors read and approved the final manuscript.



1  
2  
3 **Role of funding source:** The sponsor of the study had oversight of the trial through regular progress  
4 reports and meetings with investigators. The sponsor had no role in the data collection, data analysis, data  
5 interpretation, or writing of the report.  
6  
7  
8

### 9 **Acknowledgements**

10 The National Centre in HIV Epidemiology and Clinical Research is funded by the Australian  
11 Government, Department of Health and Ageing. The views expressed in this publication do not  
12 necessarily represent the position of the Australian Government. NCHECR is affiliated with the Faculty  
13 of Medicine.  
14  
15

16 We gratefully acknowledge the contribution of the women who participated in the MIRA study, the  
17 funding provided by the Bill and Melinda Gates Foundation (Grant number 21082), the collaboration with  
18 the University of California, San Francisco and Dr Nancy Padian, the overall principal investigator of the  
19 MIRA trial. We also acknowledge the contributions of Sharika Gappoo and Sarita Naidoo, the project  
20 leaders at the Durban clinical research sites.  
21  
22  
23  
24  
25  
26  
27  
28  
29  
30  
31  
32  
33  
34  
35  
36  
37  
38  
39  
40  
41  
42  
43  
44  
45  
46  
47  
48  
49  
50  
51  
52  
53  
54  
55  
56  
57  
58  
59  
60

## REFERENCES

1. UNAIDS: *Report on the global AIDS epidemic 2010*. Geneva: Joint United Nations Programme on HIV/AIDS; 2010.
2. Pettifor AE, Rees HV, Kleinschmidt I, Steffenson AE, MacPhail C, Hlongwa-Madikizela L, Vermaak K, Padian NS: **Young people's sexual health in South Africa: HIV prevalence and sexual behaviors from a nationally representative household survey**. *AIDS* 2005, **19**:1525-1534.
3. UNAIDS: *Report on the global AIDS epidemic 2006*. Geneva: UNAIDS; 2006.
4. Moss G, Clemetson D, D'Costa L, Plummer F, Ndinya-Achola J, Reilly M, Holmes K, Piot P, Maitha G, Hillier S: **Association of cervical ectopy with heterosexual transmission of human immunodeficiency virus: Results of a study of couples in Nairobi, Kenya**. *J Infect Dis* 1991, **164**:588-591.
5. Coombs R, Reichelderfer P, Landay A: **Recent observations on HIV type-1 infection in the genital tract of men and women**. *AIDS* 2003, **17**:455.
6. Glynn J, Kayuni N, Floyd S, Banda E, Francis-Chizororo M, Tanton C, Molesworth A, Hemmings J, Crampin A, French N: **Age at menarche, schooling, and sexual debut in northern Malawi**. *PLoS One* 2010, **5**:e15334.
7. Greenberg J, Magder L, Aral S: **Age at first coitus a marker for risky sexual behavior in women**. *Sex Transm Dis* 1992, **19**:331.
8. Gigante D, Victora C, Gonçalves H, Lima R, Barros F, Rasmussen K: **Risk factors for childbearing during adolescence in a population-based birth cohort in southern Brazil**. *Rev Panam Salud Publica* 2004, **16**:1-10.
9. Maharaj P, Munthree C: **Coerced first sexual intercourse and selected reproductive health outcomes among young women in KwaZulu-Natal, South Africa**. *J Biosoc Sci* 2007, **39**:231-244.
10. Gregson S, Nyamukapa C, Garnett G, Mason P, Zhuwau T, Cara I M, Chandiwana S, Anderson R: **Sexual mixing patterns and sex-differentials in teenage exposure to HIV infection in rural Zimbabwe**. *Lancet* 2002, **359**:1896-1903.
11. Manning W, Longmore M, Giordano P: **The relationship context of contraceptive use at first intercourse**. *Fam Plann Perspect* 2000, **32**:104-110.
12. Boileau C, Clark S, Assche S, Poulin M, Reniers G, Watkins S, Kohler H, Heymann S: **Sexual and marital trajectories and HIV infection among ever-married women in rural Malawi**. *Sex Transm Infect* 2009, **85**:i27-i33.
13. Laga M, Schwärlander B, Pisani E, Sow PS, Caraël M: **To stem HIV in Africa, prevent transmission to young women**. *AIDS* 2001, **15**:931-934.
14. Asimwe-Okiror G, Opio A, Musinguzi J, Madraa E, Tembo G, Caraël M: **Change in sexual behaviour and decline in HIV infection among young pregnant women in urban Uganda**. *AIDS* 1997, **11**:1757-1763.
15. Jukes M, Simmons S, Bundy D: **Education and vulnerability: The role of schools in protecting young women and girls from HIV in southern Africa**. *AIDS* 2008, **22**:S41-S56.
16. Hargreaves JR, Howe LD: **Changes in HIV prevalence among differently educated groups in Tanzania between 2003 and 2007**. *AIDS* 2010, **24**:755-761

17. Hargreaves JR, Bonell CP, Boler T, Boccia D, Birdthistle I, Fletcher A, Pronyk PM, Glynn JR: **Systematic review exploring time trends in the association between educational attainment and risk of HIV infection in sub-Saharan Africa.** *AIDS* 2008, **22**:403-414
18. Padian N, van der Straten A, Ramjee G, Chipato T, de Bruyn G, Blanchard K, Shiboski S, Montgomery E, Fancher H, Cheng H: **Diaphragm and lubricant gel for prevention of HIV acquisition in southern African women: A randomised controlled trial.** *Lancet* 2007, **370**:251-261.
19. Wand H, Spiegelman D, Law M, Jalaludin B, Kaldor J, Maher L: **Estimating population attributable risk for hepatitis C seroconversion in injecting drug users in Australia: Implications for prevention policy and planning.** *Addiction* 2009, **104**:2049-2056.
20. Harrison A, Cleland J, Gouws E, Frohlich J: **Early sexual debut among young men in rural South Africa: Heightened vulnerability to sexual risk?** *Sex Transm Infect* 2005, **81**:259-261.
21. Halperin D, Epstein H: **Concurrent sexual partnerships help to explain Africa's high HIV prevalence: implications for prevention.** *Lancet* 2004, **364**:4-6.
22. Rosenberg M, Gurvey J, Adler N, Dunlop M, Ellen J: **Concurrent sex partners and risk for sexually transmitted diseases among adolescents.** *Sex Transm Dis* 1999, **26**:208-212.
23. Drain PK, Smith JS, Hughes JP, Halperin DT, Holmes KK: **Correlates of national HIV seroprevalence: An ecologic analysis of 122 developing countries.** *J Acquir Immune Defic Syndr* 2004, **35**:407-420.
24. Pettifor AE, van der Straten A, Dunbar MS, Shiboski SC, Padian NS: **Early age of first sex: A risk factor for HIV infection among women in Zimbabwe.** *AIDS* 2004, **18**:1435-1442.
25. Zaba B, Pisani E, Slaymaker E, Boerma JT: **Age at first sex: Understanding recent trends in African demographic surveys.** *Sex Transm Infect* 2004, **80**:ii28-ii35.
26. Yotebieng M, Halpern CT, Mitchell EM, Adimora AA: **Correlates of condom use among sexually experienced secondary-school male students in Nairobi, Kenya.** *SAHARA J* 2009, **6**:9-16.
27. Mathews C, Aaro LE, Flisher AJ, Mukoma W, Wubs AG, Schaalma H: **Predictors of early first sexual intercourse among adolescents in Cape Town, South Africa.** *Health Educ Res* 2009, **24**:1-10.
28. Mmbaga EJ, Leyna GH, Mnyika KS, Hussain A, Klepp KI: **Education attainment and the risk of HIV-1 infections in rural Kilimanjaro Region of Tanzania, 1991-2005: A reversed association.** *Sex Transm Dis* 2007, **34**:947-953.
29. Johnson L, Dorrington R, Bradshaw D, Plessis H, Makubalo L: **The effect of educational attainment and other factors on HIV risk in South African women: Results from antenatal surveillance, 2000-2005.** *AIDS* 2009, **23**:1583-1588.
30. Bärnighausen T, Hosegood V, Timaeus IM, Newell M-L: **The socioeconomic determinants of HIV incidence: Evidence from a longitudinal, population-based study in rural South Africa.** *AIDS* 2007, **21**:S29-S38
31. Glynn JR, Kayuni N, Floyd S, Banda E, Francis-Chizororo M, Tanton C, Molesworth A, Hemmings J, Crampin AC, French N: **Age at menarche, schooling, and sexual debut in northern Malawi.** *PLoS One* 2010, **5**:e15334.

- 1  
2  
3 32. Manzini N: **Sexual initiation and childbearing among adolescent girls in KwaZulu Natal, South Africa.** *Reprod Health Matters* 2001:44-52.
- 4  
5  
6 33. Gallant M, Maticka-Tyndale E: **School-based HIV prevention programmes for African youth.** *Soc Sci Med* 2004, **58**:1337-1351.
- 7  
8 34. Hargreaves JR, Bonell CP, Morison LA, Kim JC, Phetla G, Porter JD, Watts C, Pronyk PM: **Explaining continued high HIV prevalence in South Africa: socioeconomic factors, HIV incidence and sexual behaviour change among a rural cohort, 2001-2004.** *AIDS* 2007, **21 Suppl 7**:S39-48.
- 9  
10  
11  
12 35. Magnani R, MacIntyre K, Karim AM, Brown L, Hutchinson P, Kaufman C, Rutenburg N, Hallman K, May J, Dallimore A: **The impact of life skills education on adolescent sexual risk behaviors in KwaZulu-Natal, South Africa.** *J Adolesc Health* 2005, **36**:289-304.
- 13  
14  
15  
16  
17 36. Doyle AM, Ross DA, Maganja K, Baisley K, Masesa C, Andreasen A, Plummer ML, Obasi AIN, Weiss HA, Kapiga S, et al: **Long-term biological and behavioural impact of an adolescent sexual health intervention in Tanzania: Follow-up survey of the community-based MEMA kwa Vijana trial.** *PLoS Med* 2010, **7**:e1000287.
- 18  
19  
20  
21  
22 37. Kirby DB, Laris BA, Roller LA: **Sex and HIV education programs: Their impact on sexual behaviors of young people throughout the world.** *J Adolesc Health* 2007, **40**:206-217.
- 23  
24  
25  
26 38. Jewkes R: **Where to for sexual health education for adolescents in sub-Saharan Africa?** *PLoS Med* 2010, **7**:e1000288.
- 27  
28 39. Underhill K, Montgomery P, Operario D: **Sexual abstinence only programmes to prevent HIV infection in high income countries: Systematic review.** *BMJ* 2007, **335**:248.
- 29  
30  
31  
32  
33  
34  
35  
36  
37  
38  
39  
40  
41  
42  
43  
44  
45  
46  
47  
48  
49  
50  
51  
52  
53  
54  
55  
56  
57  
58  
59  
60

**Table 1:** Multivariate logistic regression: Odds Ratios (OR) and 95% confidence intervals (CI) for HIV infection

|                                                   | UNIVARIATE ANALYSIS |         | MULTIVARIATE ANALYSIS |         |
|---------------------------------------------------|---------------------|---------|-----------------------|---------|
|                                                   | OR (95% CI)         | p-value | OR (95% CI)           | p-value |
| <b>Age (years)</b>                                |                     |         |                       |         |
| <25 year                                          | 1                   |         | 1                     |         |
| 25-29 years                                       | 1.98 (1.66,2.38)    | <0.001  | 1.52 (1.23,1.87)      | <0.001  |
| 30-34 years                                       | 1.60 (1.32,1.95)    | <0.001  | 1.19 (0.94,1.50)      | 0.142   |
| 35 plus                                           | 0.70 (0.58,0.85)    | <0.001  | 0.50 (0.40,0.63)      | <0.001  |
| <b>Age at first sex (years)</b>                   |                     |         |                       |         |
| <15 year (1 <sup>st</sup> quintile)               | 1.87 (1.47,2.36)    | <0.001  | 1.96 (1.53,2.51))     | <0.001  |
| 15-16 years (2 <sup>nd</sup> quintile)            | 1.50 (1.17,1.90)    | 0.001   | 1.61 (1.25,2.08)      | <0.001  |
| 17-18 years (3 <sup>rd</sup> quintile)            | 1.41 (1.13,1.76)    | 0.002   | 1.49 (1.19,1.87)      | 0.001   |
| 19-20 years (4 <sup>th</sup> quintile)            | 1.16 (0.87,1.54)    | 0.316   | 1.18 (0.89,1.59)      | 0.251   |
| 20+ (5 <sup>th</sup> quintile)                    | 1                   |         | 1                     |         |
| <b>At least high school education</b>             |                     |         |                       |         |
| Yes                                               | 1                   |         | 1                     |         |
| No                                                | 1.21 (1.04,1.41)    | 0.010   | 1.37 (1.15,1.62)      | <0.001  |
| <b>English spoken at home</b>                     |                     |         |                       |         |
| Yes                                               | 1                   |         | -                     |         |
| No                                                | 1.91 (1.53,2.39)    | <0.001  | -                     |         |
| <b>Religion</b>                                   |                     |         |                       |         |
| Other                                             | 1                   |         | -                     |         |
| Christian                                         | 1.34 (1.06,1.71)    | 0.015   | -                     |         |
| <b>Number of lifetime sex partners</b>            |                     |         |                       |         |
| One                                               | 1                   |         | 1                     |         |
| Two                                               | 2.49 (2.01,3.10)    | <0.001  | 1.73 (1.37,2.20)      | <0.001  |
| Three                                             | 4.35 (3.47,5.44)    | <0.001  | 2.82 (2.20,3.62)      | <0.001  |
| Four or more                                      | 6.65 (5.35,8.26)    | <0.001  | 4.09 (3.20,5.22)      | <0.001  |
| <b>Cohabitation status</b>                        |                     |         |                       |         |
| Married/living w/ a sexual partner                | 1                   |         | 1                     |         |
| Not married/not living w/ a sexual partner        | 7.02 (5.20,9.47)    | <0.001  | 4.32 (3.11,6.00)      | <0.001  |
| <b>Have you ever had vaginal sex with condom?</b> |                     |         |                       |         |
| No                                                | 1                   |         | -                     |         |
| Yes                                               | 1.40 (1.21,1.63)    | <0.001  | -                     |         |
| <b>Using any contraception <sup>1</sup></b>       |                     |         |                       |         |
| Yes                                               | 1                   |         | -                     |         |
| No                                                | 1.36 (1.16,1.60)    | <0.001  | -                     |         |
| <b>HSV diagnosis</b>                              |                     |         |                       |         |
| No                                                | 1                   |         | 1                     |         |
| Yes                                               | 7.20 (5.88,8.82)    | <0.001  | 6.19 (4.98,7.70)      | <0.001  |
| <b>STI diagnosis<sup>2</sup></b>                  |                     |         |                       |         |
| No                                                | 1                   |         | 1                     |         |
| Yes                                               | 1.34 (1.12,1.61)    | 0.001   | 1.24 (1.02, 1.51)     | 0.038   |

<sup>1</sup>any of the following: male condom, female condom, pills, injectables, spermicides, withdrawal, long term (partner vasectomy, tubal ligation) other.

<sup>2</sup>*Chlamydia*, gonorrhoea, syphilis or *Trichomonas vaginalis*

**Table 2:** Association of various socio-demographic and risk characteristics with age at first sex.

|                                              | Age at first sex (quintiles)          |                                         |                                         |                                         |                                       | p-value |
|----------------------------------------------|---------------------------------------|-----------------------------------------|-----------------------------------------|-----------------------------------------|---------------------------------------|---------|
|                                              | 1 <sup>st</sup> quintile<br><15 years | 2 <sup>nd</sup> quintile<br>15-16 years | 3 <sup>rd</sup> quintile<br>17-18 years | 4 <sup>th</sup> quintile<br>19-20 years | 5 <sup>th</sup> quintile<br>>20 years |         |
| <b>Demographic factors</b>                   |                                       |                                         |                                         |                                         |                                       |         |
| Less than high school education              | 86%                                   | 76%                                     | 71%                                     | 67%                                     | 62%                                   | <0.001  |
| Zulu speaking at home                        | 96%                                   | 95%                                     | 95%                                     | 92%                                     | 92%                                   | 0.037   |
| Religion- Christian                          | 91%                                   | 90%                                     | 90%                                     | 90%                                     | 91%                                   | 0.827   |
| Single/Not living with a regular sex partner | 88%                                   | 89%                                     | 87%                                     | 85%                                     | 81%                                   | <0.001  |
| <b>Sexual risk behaviors</b>                 |                                       |                                         |                                         |                                         |                                       |         |
| Using condom (as current contraception)      | 45%                                   | 42%                                     | 47%                                     | 45%                                     | 46%                                   | 0.347   |
| Using any contraception                      | 77%                                   | 77%                                     | 77%                                     | 80%                                     | 78%                                   | 0.784   |
| At least 4 life time sex partners            | 39%                                   | 29%                                     | 25%                                     | 18%                                     | 14%                                   | <0.001  |
| <b>Biological risk factors</b>               |                                       |                                         |                                         |                                         |                                       |         |
| HIV prevalence                               | 48%                                   | 43%                                     | 41%                                     | 37%                                     | 33%                                   | <0.001  |
| STI prevalence                               | 20%                                   | 15%                                     | 14%                                     | 13%                                     | 12%                                   | <0.001  |
| HSV prevalence                               | 79%                                   | 74%                                     | 71%                                     | 70%                                     | 68%                                   | <0.001  |

**Table 3:** Theoretical Prevention strategies

| Modifiable risk factors                      | PAR% (95% CI)           |
|----------------------------------------------|-------------------------|
| <b>Full PAR</b>                              | <b>0.85 (0.84,0.87)</b> |
| Age at first sex (<15)                       | 0.26 (0.21-0.31)        |
| Less than high school                        | 0.13 (0.10,0.17)        |
| Age at first sex<br>+ less than high school  | <b>0.32 (0.27,0.38)</b> |
| Not cohabiting                               | 0.39 (0.35,0.43)        |
| <b>Number of life time male sex partners</b> |                         |
| Two                                          | 0.12 (0.11,0.13)        |
| Three                                        | 0.20 (0.18,0.21)        |
| Four or more                                 | 0.41 (0.39,0.43)        |
| <b>Biological risk factors</b>               |                         |
| Tested positive for STI <sup>1</sup>         | 0.05 (0.04,0.06)        |
| HSV 2                                        | 0.82 (0.80,0.83)        |

<sup>1</sup> *Chlamydia*, gonorrhoea, syphilis or *Trichomonas vaginalis* at screening

1 STROBE Statement—Checklist of items that should be included in reports of *cohort studies*

|                              | Item No | Recommendation                                                                                                                                                                                                                                                                                                                                           |
|------------------------------|---------|----------------------------------------------------------------------------------------------------------------------------------------------------------------------------------------------------------------------------------------------------------------------------------------------------------------------------------------------------------|
| <b>Title and abstract</b>    | 1       | (a) Indicate the study's design with a commonly used term in the title or the abstract (page 1)<br>(b) Provide in the abstract an informative and balanced summary of what was done and what was found (page 1)                                                                                                                                          |
| <b>Introduction</b>          |         |                                                                                                                                                                                                                                                                                                                                                          |
| Background/rationale         | 2       | Explain the scientific background and rationale for the investigation being reported (Page 1-2)                                                                                                                                                                                                                                                          |
| Objectives                   | 3       | State specific objectives, including any prespecified hypotheses (page 3)                                                                                                                                                                                                                                                                                |
| <b>Methods</b>               |         |                                                                                                                                                                                                                                                                                                                                                          |
| Study design                 | 4       | Present key elements of study design early in the paper(pages 4-6)                                                                                                                                                                                                                                                                                       |
| Setting                      | 5       | Describe the setting, locations, and relevant dates, including periods of recruitment, exposure, follow-up, and data collection (page 4)                                                                                                                                                                                                                 |
| Participants                 | 6       | (a) Give the eligibility criteria, and the sources and methods of selection of participants. Describe methods of follow-up (N/A)<br>(b) For matched studies, give matching criteria and number of exposed and unexposed (N/A)                                                                                                                            |
| Variables                    | 7       | Clearly define all outcomes, exposures, predictors, potential confounders, and effect modifiers. Give diagnostic criteria, if applicable ( 4-6)                                                                                                                                                                                                          |
| Data sources/<br>measurement | 8*      | For each variable of interest, give sources of data and details of methods of assessment (measurement). Describe comparability of assessment methods if there is more than one group (4-6)                                                                                                                                                               |
| Bias                         | 9       | Describe any efforts to address potential sources of bias (page 12)                                                                                                                                                                                                                                                                                      |
| Study size                   | 10      | Explain how the study size was arrived at (N/A)                                                                                                                                                                                                                                                                                                          |
| Quantitative variables       | 11      | Explain how quantitative variables were handled in the analyses. If applicable, describe which groupings were chosen and why (4-5)                                                                                                                                                                                                                       |
| Statistical methods          | 12      | (a) Describe all statistical methods, including those used to control for confounding (Pages 4-6)<br>(b) Describe any methods used to examine subgroups and interactions (N/A)<br>(c) Explain how missing data were addressed (5)<br>(d) If applicable, explain how loss to follow-up was addressed (N/A)<br>(e) Describe any sensitivity analyses (N/A) |
| <b>Results</b>               |         |                                                                                                                                                                                                                                                                                                                                                          |
| Participants                 | 13*     | (a) Report numbers of individuals at each stage of study—eg numbers potentially eligible, examined for eligibility, confirmed eligible, included in the study, completing follow-up, and analysed (N/A)<br>(b) Give reasons for non-participation at each stage (N/A)<br>(c) Consider use of a flow diagram (N/A)                                        |
| Descriptive data             | 14*     | (a) Give characteristics of study participants (eg demographic, clinical, social) and information on exposures and potential confounders (6)<br>(b) Indicate number of participants with missing data for each variable of interest (5)<br>(c) Summarise follow-up time (eg, average and total amount) (N/A)                                             |
| Outcome data                 | 15*     | Report numbers of outcome events or summary measures over time (6)                                                                                                                                                                                                                                                                                       |
| Main results                 | 16      | (a) Give unadjusted estimates and, if applicable, confounder-adjusted estimates and their precision (eg, 95% confidence interval). Make clear which confounders were adjusted for and why they were included (6-7)                                                                                                                                       |



|                          |    |                                                                                                                                                                                         |
|--------------------------|----|-----------------------------------------------------------------------------------------------------------------------------------------------------------------------------------------|
|                          |    | (b) Report category boundaries when continuous variables were categorized (pages 5-6 and page 7)                                                                                        |
|                          |    | (c) If relevant, consider translating estimates of relative risk into absolute risk for a meaningful time period (N/A)                                                                  |
| Other analyses           | 17 | Report other analyses done—eg analyses of subgroups and interactions, and sensitivity analyses (6)                                                                                      |
| <b>Discussion</b>        |    |                                                                                                                                                                                         |
| Key results              | 18 | Summarise key results with reference to study objectives (pages 12-13)                                                                                                                  |
| Limitations              | 19 | Discuss limitations of the study, taking into account sources of potential bias or imprecision. Discuss both direction and magnitude of any potential bias (pages 13-14)                |
| Interpretation           | 20 | Give a cautious overall interpretation of results considering objectives, limitations, multiplicity of analyses, results from similar studies, and other relevant evidence (page 12-13) |
| Generalisability         | 21 | Discuss the generalisability (external validity) of the study results (12)                                                                                                              |
| <b>Other information</b> |    |                                                                                                                                                                                         |
| Funding                  | 22 | Give the source of funding and the role of the funders for the present study and, if applicable, for the original study on which the present article is based (14)                      |

\*Give information separately for exposed and unexposed groups.

**Note:** An Explanation and Elaboration article discusses each checklist item and gives methodological background and published examples of transparent reporting. The STROBE checklist is best used in conjunction with this article (freely available on the Web sites of PLoS Medicine at <http://www.plosmedicine.org/>, Annals of Internal Medicine at <http://www.annals.org/>, and Epidemiology at <http://www.epidem.com/>). Information on the STROBE Initiative is available at <http://www.strobe-statement.org>.

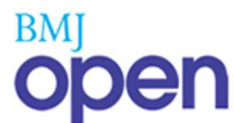

**Early age of coital debut is associated with increased HIV seroprevalence and incidence in a cohort of women in Durban, South Africa**

|                                 |                                                                                                            |
|---------------------------------|------------------------------------------------------------------------------------------------------------|
| Journal:                        | <i>BMJ Open</i>                                                                                            |
| Manuscript ID:                  | bmjopen-2011-000285.R1                                                                                     |
| Article Type:                   | Research                                                                                                   |
| Date Submitted by the Author:   | 11-Oct-2011                                                                                                |
| Complete List of Authors:       | Wand, Handan; University of New South wales<br>Ramjee, Gita; HIV Prevention Unit, Medical Research Council |
| <b>Primary Subject Heading</b>: | Infectious diseases                                                                                        |
| Secondary Subject Heading:      | Epidemiology, Sexual health                                                                                |
| Keywords:                       | Epidemiology < ONCOLOGY, PUBLIC HEALTH, STATISTICS & RESEARCH METHODS                                      |
|                                 |                                                                                                            |

SCHOLARONE™  
Manuscripts

Peer review only

1  
2  
3  
4  
5  
6  
7 **Early age of coital debut is associated with increased HIV**  
8 **seroprevalence and incidence in a cohort of women in**  
9 **Durban, South Africa**  
10  
11  
12  
13  
14  
15  
16

17 Handan Wand<sup>1</sup> and Gita Ramjee<sup>2</sup>  
18  
19

20 **Page count (including references, tables and figures): 19**  
21

22 **Word count – Text: 3,542 ; Abstract: 262; Figure:1; Tables: 4**  
23  
24  
25  
26

27 <sup>1</sup> Kirby Institute, University of New South Wales, Australia  
28

29 <sup>2</sup> HIV Prevention Research Unit, Medical Research Council, Durban, South Africa,  
30  
31  
32  
33  
34  
35  
36  
37  
38  
39  
40  
41  
42  
43  
44  
45  
46  
47  
48  
49  
50  
51  
52  
53  
54  
55  
56  
57  
58  
59  
60

1  
2  
3  
4  
5  
6 **Abstract:**  
7

8 **Objective:** We aimed to investigate the impact of early sexual debut on HIV seroprevalence and  
9 incidence rates among women a cohort of women.  
10

11  
12 **Method:** A total of 3,492 women who were screened for the Methods for Improving  
13 Reproductive Health in Africa (MIRA) trial from Durban were included in the current study.  
14 Trends in key risk factors for HIV infection were investigated by the quintiles of the age at  
15 sexual debut. Univariate and multivariate logistic regression models were used to determine  
16 independent predictors of HIV seropositivity at the screening visit. Impact of early sexual debut  
17 was investigated among women who enrolled in the trial using Kaplan-Meier curves, unadjusted  
18 and adjusted Cox regression models.  
19  
20  
21  
22  
23  
24  
25  
26  
27  
28  
29

30 **Results:** Lowest quintiles of age at sexual debut, less than high school education, a higher  
31 number of lifetime sexual partners and lack of cohabitation, being diagnosed with HSV2 and  
32 other sexually transmitted infections were all significantly associated with prevalent HIV  
33 infection in multivariate analysis. During follow-up, 148 (6.8 per 100 person year) women  
34 seroconverted. Highest seroconversion rate was observed among women who had reported to  
35 have had sex 15 years or younger (12.0 per 100 person year). Overall, impact of risk factors  
36 considered in this study was associated with considerable potential reductions in HIV prevalence  
37 and incidence rates (85% and 77% respectively).  
38  
39  
40  
41  
42  
43  
44  
45  
46  
47  
48  
49  
50

51 **Conclusion:** The association of HIV status with younger age at sexual debut may likely due to  
52 an increased number of lifetime partners. This increase could result from longer duration of  
53 sexual life. Prevention of HIV infection should include efforts to delay age at first sex in young  
54 women.  
55  
56  
57  
58  
59  
60

## INTRODUCTION

Forty percent of all adult women living with HIV reside in southern Africa [1]. In many Southern African countries more than 30% of young women are infected with HIV [2, 3]. Adolescent and young women may be especially prone to HIV infection in comparison with older women due to the occurrence of larger areas of cervical ectopy in young women and an increased likelihood of trauma to the immature genital tract during sex [4, 5]. Early age at sexual debut has been shown to correlate with subsequent risky sexual behaviors [6, 7].

Early sexual debut (commonly defined as having had first sexual intercourse at or before age 14) and experience of sexual coercion or violence have been reported to contribute unintended adolescent pregnancy [8, 9]. In South Africa, data from a nationally representative household survey of young people showed that 7.8% of women aged 15-24 had had sexual intercourse by age 14, and risk of HIV infection was significantly raised if a woman had been sexually active for more than 12 months at the time of the survey [2].

Age at first sex is an important indicator of sexual risk, as it can be used as a proxy for the onset of exposure to HIV infection [10]. Early sexual debut has been associated with increased sexual risk-taking behavior, such as having multiple partners and decreased contraceptive and condom use, and with incidence of sexually transmitted infections [7, 11]. Another study has shown an association between having sex at an early age and incidence of HIV infection in Malawi [12]. Delaying sexual debut may have been one of the key changes in behavior which lead to a decline in HIV infection in Uganda [13, 14].

1  
2  
3  
4 There is also particular interest in the role of schooling in sexual risk behaviors [10, 15]. The  
5  
6 association between level of schooling completed and sexual debut is complex. Although a  
7  
8 woman's level of education may be an indicator of socio-economic status, poor socio-economic  
9  
10 conditions limiting school access or contributing to poor performance may also correlate with an  
11  
12 increase in sexual activity at an early age. In Tanzania, an analysis of the relationship between  
13  
14 education level and HIV prevalence has indicated a steep decline over time in HIV infection  
15  
16 among people who had a secondary education; of particular interest, the lowest HIV prevalence  
17  
18 was found in young women (15-24 years) who had attended secondary school [16]. Earlier  
19  
20 meta-analysis of education and HIV prevalence data from across sub-Saharan Africa showed that  
21  
22 the relationship between education and risk of HIV infection has changed over time, with more  
23  
24 educated individuals initially at higher risk, and with a later shift of risk towards the less  
25  
26 educated, the inflection point being around 1996 [17].  
27  
28  
29  
30  
31  
32  
33

34 In an attempt to better understand the risk factors that may increase South African women's risk  
35  
36 of HIV infection, we investigated the independent risk factors and their population level impact  
37  
38 on HIV infection among sexually active women in rural and semi-rural neighborhoods of  
39  
40 Durban. A sub-analysis was performed to investigate the association between the age at sexual  
41  
42 debut and HIV seroconversion during the study by including only women who were HIV  
43  
44 seronegative at the screening and enrolled in the study.  
45  
46  
47  
48  
49  
50

## 51 **METHODS:**

### 52 *Study Population:*

53  
54  
55 A total of 3,492 sexually active women who consented to screening for Methods for Improving  
56  
57 Reproductive Health in Africa (MIRA) trial of the diaphragm for HIV prevention [18]  
58  
59  
60

1 (September 2002-September 2005; undertaken in Umkomaas and Botha's Hill, southern Durban)  
2  
3 were included in this study. The MIRA study was a randomised controlled open-label study  
4  
5 comparing the effectiveness of the latex diaphragm plus lubricant gel with provision of condoms  
6  
7 alone for prevention of heterosexual HIV acquisition among women. The methodology for the  
8  
9 MIRA study has previously been published [18]. Eligibility criteria included: being sexually  
10  
11 active (defined as average of 4 sexual acts per month); between 18 and 49 years old; HIV  
12  
13 negative; *Chlamydia trachomatis* and *Neisseria gonorrhoeae* negative at the screening visit (or  
14  
15 willing to be treated if positive); not pregnant and willing to follow the study protocol  
16  
17 requirements. All women provided written informed consent at screening.  
18  
19  
20  
21  
22  
23  
24

### 25 *Study procedures*

26  
27 At screening, an interviewer-administered questionnaire covering topics on demographics and  
28  
29 sexual behaviour was undertaken. Participants were also offered HIV pre-test counselling before  
30  
31 HIV and STI testing at the screening visit. HIV diagnostic testing was accomplished using two  
32  
33 rapid tests on whole blood from either finger-prick or venipuncture: Determine HIV-1/2 (Abbott  
34  
35 Laboratories, Tokyo, Japan) and Oraquick (Orasure Technologies, Bethlehem, PA, USA). Those  
36  
37 found to be HIV infected were referred to appropriate referral clinics for HIV care. A urine  
38  
39 specimen was collected for testing for gonorrhoea, chlamydia and trichomonas vaginalis  
40  
41 infections, and a blood specimen for syphilis and HSV2 testing. STI testing was completed  
42  
43 using the following methodologies: Chlamydia and gonorrhoea were assessed using PCR (Roche  
44  
45 Pharmaceuticals, Branchburg, NJ, USA); syphilis by rapid plasma reagin (RPR) in combination  
46  
47 with *Treponema pallidum* haemagglutination (TPHA) (Randox Laboratories, Crumlin, UK);  
48  
49 HSV2 by ELISA (FOCUS Diagnostics, Cypress, CA, USA); and *Trichomonas vaginalis* by PCR  
50  
51 (Roche Pharmaceuticals, Branchburg, NJ, USA).  
52  
53  
54  
55  
56  
57  
58  
59  
60

1 At the enrolment visit, participants provided written informed consent, underwent a pelvic  
2 examination, provided a blood sample for testing for syphilis (rapid plasma reagin [RPR] and  
3 *Treponema pallidum* haemagglutinin [TPHA], Randox Laboratories, Crumlin, UK) and herpes  
4 simplex virus 2 (HSV2; ELISA, FOCUS Diagnostics, Cypress, CA, USA), and provided a urine  
5 sample for pregnancy testing. After enrolment, at each quarterly follow-up visit, HIV and STI  
6 testing were conducted.  
7  
8  
9  
10  
11  
12  
13  
14  
15  
16  
17

18 The MIRA study protocol was reviewed and approved by the University of California at San  
19 Francisco Institutional Review Board Committee on Human Research. The study received  
20 ethical approval from the Biomedical Research Ethics Committee of the University of KwaZulu-  
21 Natal, as well as the ethics review committees at all other local institutions and collaborating  
22 organisations. This study is registered with ClinicalTrials.gov, number NCT00121459.  
23  
24  
25  
26  
27  
28  
29  
30  
31

### 32 *Measurements*

34 The primary outcomes were proportion of women who tested positive for HIV infection at the  
35 screening visit and time to seroconversion among those who tested negative for HIV infection  
36 and enrolled in the study. Among covariates under consideration: age at the screening (<25, 25-  
37 34, 35+), age at sexual debut (in quintiles: <15 years, 15-16 years, 17-18 years, 19-20 years and  
38 21 years or older), education level <12 years (less than high school), language spoken at home  
39 (English versus others), religion (Christian versus other), cohabitation status (single/not  
40 cohabitating vs. married/cohabiting), ever had vaginal sex using condom (yes/no), using any  
41 contraception (yes/no), diagnosis with herpes simplex virus 2 (HSV2) and other sexually  
42 transmitted infections (STIs) (chlamydia, gonorrhoea, syphilis or trichomonas vaginalis). Current  
43 study only used the available data.  
44  
45  
46  
47  
48  
49  
50  
51  
52  
53  
54  
55  
56  
57  
58  
59  
60



### *Statistical Analyses*

We expressed descriptive data as percentages, medians and interquartile ranges (IQR). Chi-square test for trend (categorical variables) and Kruskal-Wallis test (continuous variables) were used to formally compare the risk factors across the quintiles of age at sexual debut.

We examined the individual associations of the risk factors described above using univariate logistic regression, taking the HIV serostatus as the primary outcome. Next, marginally significant variables with  $p < 0.10$  in univariate analysis were included in multivariate analysis. Variables with  $p < 0.05$  were retained in the final multivariate logistic model in a forward stepwise manner. We also tested for interactions at  $p < 0.10$  for entry into the model. Finally, to test the fitness of the model, we performed the goodness of fit test examined using the Hosmer-Lemeshow criteria. A low chi-square value and a high non-significant  $P$  value for the Hosmer-Lemeshow test indicated that the fit of the model and observed values was acceptable.

The incidence rate for HIV infection, expressed as time to seroconversion, was estimated for women who were HIV-negative at screening and satisfied the eligibility criteria. The date of seroconversion was estimated using the midpoint between the last negative and the first positive antibody test results within the follow-up period. Kaplan–Meier survival analyses were carried out to estimate the crude HIV incidence rate over time; results were stratified and compared by the five age groups of sexual debut. Cox proportional hazard regression analysis was performed to calculate unadjusted and adjusted HIV incidence rates.

1 All analyses were performed using Stata 10.0 (College Station, Texas) and SAS 9.2 (Rayleigh,  
2 North Carolina).  
3  
4  
5  
6  
7

### 8 *Population Attributable Risk*

9  
10 Although, odds ratios (ORs) and relative risks (RRs) may be well suited to assessment of  
11 causality, they do not provide information about the potential impact on disease occurrence by  
12 eliminating these risk factors. The population attributable risk (PAR) provides additional  
13 information to determine the public health implications of risk factor reduction/elimination at  
14 population level. Briefly, we estimated PARs associated with modifiable (at least theoretically)  
15 and their 95% confidence interval (CI) to estimate the population level impact of the risk factors  
16 associated with HIV seroprevalence and incidence [19]. We estimated the proportion of HIV  
17 seroprevalence and incidence cases could be attributed to the combined effect of these risk  
18 factors.  
19  
20  
21  
22  
23  
24  
25  
26  
27  
28  
29  
30  
31  
32  
33  
34

### 35 **Results**

36 A total of 3,492 women consented to be screened for the MIRA trial from Durban clinical  
37 research sites. The median age was 26 (inter-quartile range (IQR): 22-33), and the majority of  
38 women (96%) reported speaking Zulu at home. Only 26% of the women had completed 12 years  
39 of schooling. Approximately 86% were either single or not living with their sexual partners. The  
40 median age at sexual debut was 17 (IQR: 16-18) (data not shown). Overall prevalence of HIV  
41 infection, STIs (chlamydia, gonorrhoea, syphilis or trichomonas vaginalis) and HSV2 were 41%,  
42 16% and 73% respectively.  
43  
44  
45  
46  
47  
48  
49  
50  
51  
52  
53  
54  
55

56 *HIV seroprevalence and other characteristics of women by quintiles of age at sexual debut*  
57  
58  
59  
60

1 Table 1 presents the distribution of various demographic characteristics, sexual behaviors and  
2 biological risk factors according to the quintiles of age at sexual debut. Compared to the highest  
3 two quintiles, women in the lowest three quintiles were younger ( $P < 0.001$ ). Significant  
4 associations were found between age at sexual debut and key sexual risk behaviors. There was a  
5 linear decreasing trend observed between the proportion of women who had less than high  
6 school education and age at first sex ( $P_{\text{trend}} < 0.001$ ). For example, compared with the oldest age  
7 at first sexual debut ( $> 20$  years), those women in the earliest age at first sexual debut quintile  
8 ( $< 15$  years) were less likely to have completed high school (62% vs. 86%,  $P_{\text{trend}} < 0.001$ ). Women  
9 were similar in terms of religion across the quintiles of the age at first sex ( $P_{\text{trend}} = 0.827$ ). A  
10 slightly higher proportion of women reported speaking Zulu at home in the earlier quintiles of  
11 the age at first sex compared with the higher quintiles ( $P_{\text{trend}} = 0.037$ ). Women who initiated  
12 sexual activity at an early age were more likely to report not living with their husband or sexual  
13 partners compared to those who were older. With regard to the number of sexual partners during  
14 their lifetime, early initiators were significantly more likely to have had multiple partners over  
15 their lifetimes (having at least four lifetime sex partners;  $P_{\text{trend}} < 0.001$ ). However, other sexual  
16 risk behaviors such as proportion of women using any contraception and condoms as their main  
17 form of contraception were similar across the quintiles ( $P_{\text{trend}} = 0.784$  and  $P_{\text{trend}} = 0.347$   
18 respectively). The proportion of women who tested positive for HIV infection, STIs and HSV2  
19 were the highest among those who had early onset sexual activity ( $P_{\text{trend}} < 0.001$ , all).

#### 20 *Risk factors for HIV seropositivity*

21 Table 2 presents univariate and multivariate logistic regression results. Age at the screening visit  
22 had an inverted U-shape association with risk of HIV seropositivity: compared to the youngest  
23 group (i.e. 18-25 years old), those aged 25-29 years showed increased risk (OR: 1.52, 95% CI:  
24 1.23-1.87) and those aged 35 or older showed decreased risk for HIV infection. Lowest quintiles  
25  
26  
27  
28  
29  
30  
31  
32  
33  
34  
35  
36  
37  
38  
39  
40  
41  
42  
43  
44  
45  
46  
47  
48  
49  
50  
51  
52  
53  
54  
55  
56  
57  
58  
59  
60

1 of age at sexual debut, less than high school education, a higher number of lifetime sexual  
2 partners and lack of cohabitation, being diagnosed with HSV2 and STIs were all significantly  
3 associated with prevalent HIV infection in multivariate analysis. The p-value for the interaction  
4 between the quintiles of age and education in univariate analysis was calculated to be 0.683,  
5 therefore, interaction effect between these factors in the model was not considered further. The  
6 p-value for the Hosmer-Lemeshow goodness-of-fit was 0.416 indicating that the fit of the model  
7 and observed values was acceptable.  
8  
9  
10  
11  
12  
13  
14  
15  
16  
17  
18  
19

#### 20 *HIV incidence by the quintiles of age at sexual debut*

21  
22 Table 2 summarizes the crude incidence rate ratios and results from the Cox proportional hazard  
23 analyses unadjusted and adjusted risk. A total of 1,485 women enrolled in the MIRA trial, from  
24 the Durban sites, and 148 (10.0%) HIV infections occurred during the study. Figure 1 presents  
25 the Kaplan-Meier curves stratified by the quintiles of the age at sexual debut for HIV  
26 seroconversion. The most prominent effect of age at sexual debut was observed among women  
27 who had reported to have had sex 15 years or younger compared to those who had their sexual  
28 debut after 20 years of age (12.0 per 100 person year versus 6.4 per 100 person year).  
29  
30  
31  
32  
33  
34  
35  
36  
37  
38  
39  
40  
41  
42  
43  
44  
45  
46  
47  
48  
49  
50  
51  
52  
53  
54  
55  
56  
57  
58  
59  
60

We also used unadjusted and adjusted Cox proportional-hazards modelling to examine the  
associations between the risk of HIV seroconversion and the groups at age first sex. This analysis  
was not an attempt to quantify causal links for HIV seroconversion, but rather to control  
statistically for confounding for demographic and sexual risk behaviour differences (Table 3).  
Women who had their first sexual experience at age 15 year or younger had significantly higher  
risk of HIV acquisition compared to those 20 years or older (Hazard ratio (HR): 1.97, 95%  
Confidence Interval (CI):1.07-3.63, P = 0.029). This association was slightly attenuated when the

1 analysis was adjusted for age, level of education, number of sexual partners, cohabitation status  
2  
3 and ever used condom with vaginal sex (HR: 1.78, 95%CI: 0.96-3.29, P = 0.066).  
4  
5  
6  
7  
8  
9

#### 10 *Result from Population attributable risk*

11 Table 4 presents the proportion of HIV infections (**prevalence and incidence**) attributable to the  
12 independent predictors for HIV infection. Delaying age at sexual debut accounted for 26% (95%  
13 CI: 21%, 31%) of the HIV infections at the screening. Completing at least high school  
14 education, 13% (95% CI: 10%, 17%) of the **HIV seropositivity at the screening** could  
15 theoretically be prevented. Not cohabiting with a sexual partner and reporting at least four or  
16 more lifetime sexual partners accounted for 39% (95% CI: 35%, 43%) and 41% (95% CI: 39%,  
17 43%) of the cases respectively. Diagnosis with HSV2 accounted for 82% (95% CI: 80%, 83%)  
18 of the HIV cases while STIs accounted for only 5% (95% CI: 4%, 6%) of the cases. The high  
19 prevalence and high odds ratio (OR) of HSV2 and relatively low prevalence and low OR of STIs  
20 were responsible for these impacts among women.  
21  
22  
23  
24  
25  
26  
27  
28  
29  
30  
31  
32  
33  
34  
35  
36  
37  
38

39 We also present estimates of the proportion of HIV incidence cases attributable to the five  
40 modifiable risk factors – namely, early age at sexual debut (<15 years), cohabitation status,  
41 number of sexual partners, and diagnosis with HSV2 and STIs. Level of education was not  
42 associated with HIV seroconversion therefore it was not included in this analysis. In the overall  
43 study population, these factors accounted for 77% (95% CI: 72%-82%) of cases. Lack of  
44 cohabitation appeared to have the largest impact on the risk of HIV seroconversion with 54%  
45 (95% CI: 46%-62%) followed by diagnosis with HSV2 (PAR=21%, 95% CI: 14%-31%), early  
46 age at first sex (PAR=17%, 95% CI: 10%-21%) and four or more lifetime sexual partners  
47 (PAR=16%, 95% CI: 13%-20%).  
48  
49  
50  
51  
52  
53  
54  
55  
56  
57  
58  
59  
60

## Discussion:

In this study of sexually active young women who initiated sexual activity early, were significantly associated with prevalent HIV infection in multivariate analysis along with the other factors namely – reporting less than high school education, more than one lifetime sexual partners, single/not cohabiting with a sexual partner, diagnosis with HSV2 and other sexually transmitted infections at the screening. In addition, women 25- to 29- years-old were more likely to be infected compared with those ages <25 years. Several studies have reported associations between early onset of sexual activity and higher HIV prevalence among young people, who may not be biologically or psychologically ready for sex [20-24]. In fact, increasing age at first sex appears to be one contributing factor to declines in HIV prevalence among youth in sub-Saharan countries with generalized epidemics [14, 25]; each year of delay in sexual debut has been found to increase the chances that a condom would be used at debut by 1.44 times, which in turn increased the chances of subsequent consistent use substantially (among young men in Kenya) [26]. The relationship between lack of education, early sexual debut and HIV risk may be indicative of a social milieu in which young women are made vulnerable to HIV infection through interacting factors, with poverty or depressed socio-economic status [27] as one of a number of mediating forces.

A number of authors have analysed the relationship between educational attainment and risk of HIV infection, and an emerging dynamic pattern indicates that the correlation differs according to the stage of the epidemic in the country in question [16, 17, 28, 29] – the highest risk shifts from populations with higher to lower educational levels as the epidemic progresses. In the South African context in particular, recent evidence shows that higher levels of education are protective [30], in agreement with our findings.

1  
2  
3  
4 This study is exploratory, raising questions about the dynamics of women's vulnerability and  
5  
6 sexual risk. Lack of education may indeed be the key factor and pathway to risk among women  
7  
8 with early sexual debut, although we could not determine the direction of the association.  
9  
10 However, recent data from northern Malawi appears to indicate that early sexual debut may lead  
11  
12 to school drop-out since girls were viewed as "ready for marriage" [31].  
13  
14

15  
16  
17  
18 Our results also showed that women who initiated sexual activity early were more likely to  
19  
20 engage in risky sexual behaviours and a clear trend emerged indicating that early onset sexual  
21  
22 activity was associated with increased risk of HIV seroconversion during the study follow up.  
23  
24

25  
26  
27 Overall, impact of risk factors considered in this study was associated with considerable potential  
28  
29 reductions in HIV prevalence and incidence rates (85% and 77% respectively). If these results  
30  
31 are applied to the target population, majority of the HIV cases among women could potentially  
32  
33 have been avoided by effective public health interventions, particularly measures aimed at  
34  
35 reducing number of lifetime sexual partners by keeping couples together through changes in  
36  
37 labor migrating patterns.  
38  
39

40  
41  
42  
43  
44 Interventions for young women should start in late primary (10-12 years old) [32] or early high  
45  
46 school (13-15 years old) to emphasize condom promotion, as well as delay in sexual activity.  
47  
48 Reaching young women prior to sexual debut is important since it has been shown that better  
49  
50 outcomes may be expected from programmes which establish protective behaviours, rather than  
51  
52 attempting to change existing behaviour patterns [33]. A "life-skills orientation" programme  
53  
54 addressing HIV prevention education (among other needs) was intended to be fully implemented  
55  
56  
57  
58  
59  
60

1 in South African high schools by 2005, and thus the women in this study may not have directly  
2 benefited from this intervention [34].  
3  
4  
5  
6  
7

8 Continued assessment of the impact of the life skills orientation programme on HIV protective  
9 behaviours and especially biological outcomes among young people will be necessary for an  
10 effective tailored response to the epidemic – early research indicated that the programme had  
11 positive effects on reported condom use among adolescents in two centres in KwaZulu-Natal, but  
12 that other effects were at best modest [35]. Also of concern in light of this is evidence from a  
13 large scale prevention/education programme in Tanzania which found no effect on HIV or STI  
14 prevalence, although changes in behavior were reported [36].  
15  
16  
17  
18  
19  
20  
21  
22  
23  
24  
25  
26  
27

#### 28 *Potential limitations of study*

29 Several limitations need to be borne in mind when considering the interpretation of our results:  
30  
31  
32 **These data were taken from the responses of women participating in a large randomized**  
33 **controlled trial. Therefore they** may have limited representativeness. We **also** cannot rule out the  
34 effects of unmeasured characteristics such as **poverty, cultural differences**, multiple or concurrent  
35 sex partners and commercial sex on our findings. No data concerning migration, socio-economic  
36 status at the time of sexual debut, or sexual behavior data from male partners were collected or  
37 included in these analyses. We could not determine whether young women were in school at the  
38 time of sexual debut.  
39  
40  
41  
42  
43  
44  
45  
46  
47  
48  
49  
50  
51  
52

53 **Current study calculated the PAR where both the odds and hazard ratios and population**  
54 **prevalences were estimated from the same study population. In order to interpret a PAR as the**  
55 **proportion of cases caused by a risk factor and thus that could be prevented by its elimination**  
56  
57  
58  
59  
60



1 from the target population, causality needs to be proven. When PARs are estimated for more  
2  
3 speculative risk factors, they can be regarded as measuring potential impact on disease incidence  
4  
5 and the potential reduction in disease incidence could be attained from their elimination were  
6  
7 later proven to be causal.  
8  
9

## 10 11 12 13 **Conclusion**

14  
15 Our results indicate that a theory-based, contextually appropriate HIV/STD risk-reduction  
16  
17 programme may be important in shaping the sexual behavior of young adolescents before or at  
18  
19 the beginning of their sexual lives. Particularly, efforts to delay sexual debut should be  
20  
21 incorporated into comprehensive sexual education programs and should begin early, offering  
22  
23 age-appropriate messages over time. Comprehensive sexual education programs are typically  
24  
25 targeted towards youth and are predominately school-based. Opportunities to reach out-of-school  
26  
27 youth, who may be at heightened vulnerability, should be identified as well. These programs  
28  
29 may include messages such as reinforcing safer sex practices for young people who are already  
30  
31 sexually active.  
32  
33  
34  
35  
36  
37  
38  
39  
40  
41  
42  
43  
44  
45  
46  
47  
48  
49  
50  
51  
52  
53  
54  
55  
56  
57  
58  
59  
60

## ARTICLE SUMMARY:

### Article focus:

- Early sexual debut may increase women's vulnerability to HIV infection.
- Early sexual debut has been associated with increased sexual risk-taking behavior, such as having multiple partners
- Delaying sexual debut may have been one of the key changes in behavior which lead to a decline in HIV infection in the past.

### Key Messages:

- Our results showed that women who initiated sexual activity early were more likely to engage in risky sexual behaviours.
- A clear trend observed indicating that early onset sexual activity was associated with increased HIV seroprevalence and incidence.
- Comprehensive sexual education programs should reach out-of-school youth, who may be at heightened vulnerability, should be identified as well.

### Limitations and Strengths:

- Current study was cross sectional and only used the data from those who were screened for the study.

- We cannot rule out the effects of unmeasured characteristics such as multiple or concurrent sex partners and commercial sex on our findings. No data concerning migration, socio-economic status at the time of sexual debut, or sexual behavior data from male partners
- Nevertheless, current study used the data from the region where the HIV epidemic is severely high among particularly young women.

**Funding statement:**

This research received no specific grant from any funding agency in the public, commercial or not-for-profit sectors.

**Competing interests:** The authors declare that they have no competing interests.

**Authors' contributions:** GR was the principal investigator of the MIRA Durban clinical research sites. HW performed the statistical analysis. GR and HW interpreted and drafted the manuscript. Both authors read and approved the final manuscript.

**Acknowledgements**

The authors declare that they have no competing interests.

## REFERENCES

1. UNAIDS: *Report on the global AIDS epidemic 2010*. Geneva: Joint United Nations Programme on HIV/AIDS; 2010.
2. Pettifor AE, Rees HV, Kleinschmidt I, Steffenson AE, MacPhail C, Hlongwa-Madikizela L, Vermaak K, Padian NS: **Young people's sexual health in South Africa: HIV prevalence and sexual behaviors from a nationally representative household survey.** *AIDS* 2005, **19**:1525-1534.
3. UNAIDS: *Report on the global AIDS epidemic 2006*. Geneva: UNAIDS; 2006.
4. Moss G, Clemetson D, D'Costa L, Plummer F, Ndinya-Achola J, Reilly M, Holmes K, Piot P, Maitha G, Hillier S: **Association of cervical ectopy with heterosexual transmission of human immunodeficiency virus: Results of a study of couples in Nairobi, Kenya.** *J Infect Dis* 1991, **164**:588-591.
5. Coombs R, Reichelderfer P, Landay A: **Recent observations on HIV type-1 infection in the genital tract of men and women.** *AIDS* 2003, **17**:455.
6. Glynn J, Kayuni N, Floyd S, Banda E, Francis-Chizororo M, Tanton C, Molesworth A, Hemmings J, Crampin A, French N: **Age at menarche, schooling, and sexual debut in northern Malawi.** *PLoS One* 2010, **5**:e15334.
7. Greenberg J, Magder L, Aral S: **Age at first coitus a marker for risky sexual behavior in women.** *Sex Transm Dis* 1992, **19**:331.
8. Gigante D, Victora C, Gonçalves H, Lima R, Barros F, Rasmussen K: **Risk factors for childbearing during adolescence in a population-based birth cohort in southern Brazil.** *Rev Panam Salud Publica* 2004, **16**:1-10.
9. Maharaj P, Munthre C: **Coerced first sexual intercourse and selected reproductive health outcomes among young women in KwaZulu-Natal, South Africa.** *J Biosoc Sci* 2007, **39**:231-244.
10. Gregson S, Nyamukapa C, Garnett G, Mason P, Zhuwau T, Cara I M, Chandiwana S, Anderson R: **Sexual mixing patterns and sex-differentials in teenage exposure to HIV infection in rural Zimbabwe.** *Lancet* 2002, **359**:1896-1903.
11. Manning W, Longmore M, Giordano P: **The relationship context of contraceptive use at first intercourse.** *Fam Plann Perspect* 2000, **32**:104-110.
12. Boileau C, Clark S, Assche S, Poulin M, Reniers G, Watkins S, Kohler H, Heymann S: **Sexual and marital trajectories and HIV infection among ever-married women in rural Malawi.** *Sex Transm Infect* 2009, **85**:i27-i33.

- 1 13. Laga M, Schwärtlander B, Pisani E, Sow PS, Caraël M: **To stem HIV in Africa, prevent**  
2 **transmission to young women.** *AIDS* 2001, **15**:931-934.
- 3 14. Asiimwe-Okiror G, Opio A, Musinguzi J, Madraa E, Tembo G, Caraël M: **Change in**  
4 **sexual behaviour and decline in HIV infection among young pregnant women in**  
5 **urban Uganda.** *AIDS* 1997, **11**:1757-1763.
- 6 15. Jukes M, Simmons S, Bundy D: **Education and vulnerability: The role of schools in**  
7 **protecting young women and girls from HIV in southern Africa.** *AIDS* 2008, **22**:S41-  
8 S56.
- 9 16. Hargreaves JR, Howe LD: **Changes in HIV prevalence among differently educated**  
10 **groups in Tanzania between 2003 and 2007.** *AIDS* 2010, **24**:755-761
- 11 17. Hargreaves JR, Bonell CP, Boler T, Boccia D, Birdthistle I, Fletcher A, Pronyk PM,  
12 Glynn JR: **Systematic review exploring time trends in the association between**  
13 **educational attainment and risk of HIV infection in sub-Saharan Africa.** *AIDS* 2008,  
14 **22**:403-414
- 15 18. Padian N, van der Straten A, Ramjee G, Chipato T, de Bruyn G, Blanchard K, Shiboski  
16 S, Montgomery E, Fancher H, Cheng H: **Diaphragm and lubricant gel for prevention**  
17 **of HIV acquisition in southern African women: A randomised controlled trial.**  
18 *Lancet* 2007, **370**:251-261.
- 19 19. Wand H, Spiegelman D, Law M, Jalaludin B, Kaldor J, Maher L: **Estimating population**  
20 **attributable risk for hepatitis C seroconversion in injecting drug users in Australia:**  
21 **Implications for prevention policy and planning.** *Addiction* 2009, **104**:2049-2056.
- 22 20. Harrison A, Cleland J, Gouws E, Frohlich J: **Early sexual debut among young men in**  
23 **rural South Africa: Heightened vulnerability to sexual risk?** *Sex Transm Infect* 2005,  
24 **81**:259-261.
- 25 21. Halperin D, Epstein H: **Concurrent sexual partnerships help to explain Africa's high**  
26 **HIV prevalence: implications for prevention.** *Lancet* 2004, **364**:4-6.
- 27 22. Rosenberg M, Gurvey J, Adler N, Dunlop M, Ellen J: **Concurrent sex partners and risk**  
28 **for sexually transmitted diseases among adolescents.** *Sex Transm Dis* 1999, **26**:208-  
29 212.
- 30 23. Drain PK, Smith JS, Hughes JP, Halperin DT, Holmes KK: **Correlates of national HIV**  
31 **seroprevalence: An ecologic analysis of 122 developing countries.** *J Acquir Immune*  
32 *Defic Syndr* 2004, **35**:407-420.
- 33 24. Pettifor AE, van der Straten A, Dunbar MS, Shiboski SC, Padian NS: **Early age of first**  
34 **sex: A risk factor for HIV infection among women in Zimbabwe.** *AIDS* 2004,  
35 **18**:1435-1442.
- 36 25. Zaba B, Pisani E, Slaymaker E, Boerma JT: **Age at first sex: Understanding recent**  
37 **trends in African demographic surveys.** *Sex Transm Infect* 2004, **80**:ii28-ii35.
- 38 26. Yotebieng M, Halpern CT, Mitchell EM, Adimora AA: **Correlates of condom use**  
39 **among sexually experienced secondary-school male students in Nairobi, Kenya.**  
40 *SAHARA J* 2009, **6**:9-16.
- 41 27. Mathews C, Aaro LE, Flisher AJ, Mukoma W, Wubs AG, Schaalma H: **Predictors of**  
42 **early first sexual intercourse among adolescents in Cape Town, South Africa.** *Health*  
43 *Educ Res* 2009, **24**:1-10.
- 44 28. Mmbaga EJ, Leyna GH, Mnyika KS, Hussain A, Klepp KI: **Education attainment and**  
45 **the risk of HIV-1 infections in rural Kilimanjaro Region of Tanzania, 1991-2005: A**  
46 **reversed association.** *Sex Transm Dis* 2007, **34**:947-953.
- 47 29. Johnson L, Dorrington R, Bradshaw D, Plessis H, Makubalo L: **The effect of**  
48 **educational attainment and other factors on HIV risk in South African women:**  
49 **Results from antenatal surveillance, 2000–2005.** *AIDS* 2009, **23**:1583-1588.
- 50  
51  
52  
53  
54  
55  
56  
57  
58  
59  
60

- 1  
2  
3  
4  
5  
6  
7  
8  
9  
10  
11  
12  
13  
14  
15  
16  
17  
18  
19  
20  
21  
22  
23  
24  
25  
26  
27  
28  
29  
30  
31  
32  
33  
34  
35  
36  
37  
38  
39  
40  
41  
42  
43  
44  
45  
46  
47  
48  
49  
50  
51  
52  
53  
54  
55  
56  
57  
58  
59  
60
30. Bärnighausen T, Hosegood V, Timaeus IM, Newell M-L: **The socioeconomic determinants of HIV incidence: Evidence from a longitudinal, population-based study in rural South Africa.** *AIDS* 2007, **21**:S29-S38
  31. Glynn JR, Kayuni N, Floyd S, Banda E, Francis-Chizororo M, Tanton C, Molesworth A, Hemmings J, Crampin AC, French N: **Age at menarche, schooling, and sexual debut in northern Malawi.** *PLoS One* 2010, **5**:e15334.
  32. Manzini N: **Sexual initiation and childbearing among adolescent girls in KwaZulu Natal, South Africa.** *Reprod Health Matters* 2001:44-52.
  33. Gallant M, Maticka-Tyndale E: **School-based HIV prevention programmes for African youth.** *Soc Sci Med* 2004, **58**:1337-1351.
  34. Hargreaves JR, Bonell CP, Morison LA, Kim JC, Phetla G, Porter JD, Watts C, Pronyk PM: **Explaining continued high HIV prevalence in South Africa: socioeconomic factors, HIV incidence and sexual behaviour change among a rural cohort, 2001-2004.** *AIDS* 2007, **21 Suppl 7**:S39-48.
  35. Magnani R, MacIntyre K, Karim AM, Brown L, Hutchinson P, Kaufman C, Rutenburg N, Hallman K, May J, Dallimore A: **The impact of life skills education on adolescent sexual risk behaviors in KwaZulu-Natal, South Africa.** *J Adolesc Health* 2005, **36**:289-304.
  36. Doyle AM, Ross DA, Maganja K, Baisley K, Masesa C, Andreasen A, Plummer ML, Obasi AIN, Weiss HA, Kapiga S, et al: **Long-term biological and behavioural impact of an adolescent sexual health intervention in Tanzania: Follow-up survey of the community-based MEMA kwa Vijana trial.** *PLoS Med* 2010, **7**:e1000287.

**Table 1:** Association of various socio-demographic and risk characteristics with age at first sex.

|                                              | Age at first sex (quintiles)          |                                         |                                         |                                         |                                       | p-value             |
|----------------------------------------------|---------------------------------------|-----------------------------------------|-----------------------------------------|-----------------------------------------|---------------------------------------|---------------------|
|                                              | 1 <sup>st</sup> quintile<br><15 years | 2 <sup>nd</sup> quintile<br>15-16 years | 3 <sup>rd</sup> quintile<br>17-18 years | 4 <sup>th</sup> quintile<br>19-20 years | 5 <sup>th</sup> quintile<br>>20 years |                     |
| <b>Demographic factors</b>                   |                                       |                                         |                                         |                                         |                                       |                     |
| Age (years), median (IQR)                    | 27 (21-34)                            | 25 (20-32)                              | 25 (21-32)                              | 28 (23-34)                              | 30 (25-35)                            | <0.001 <sup>†</sup> |
| Less than high school education              | 86%                                   | 76%                                     | 71%                                     | 67%                                     | 62%                                   | <0.001              |
| Zulu speaking at home                        | 96%                                   | 95%                                     | 95%                                     | 92%                                     | 92%                                   | 0.037               |
| Religion- Christian                          | 91%                                   | 90%                                     | 90%                                     | 90%                                     | 91%                                   | 0.827               |
|                                              |                                       |                                         |                                         |                                         |                                       |                     |
| Single/Not living with a regular sex partner | 88%                                   | 89%                                     | 87%                                     | 85%                                     | 81%                                   | <0.001              |
|                                              |                                       |                                         |                                         |                                         |                                       |                     |
| <b>Sexual risk behaviors</b>                 |                                       |                                         |                                         |                                         |                                       |                     |
| Using condom (as current contraception)      | 45%                                   | 42%                                     | 47%                                     | 45%                                     | 46%                                   | 0.347               |
| Using any contraception                      | 77%                                   | 77%                                     | 77%                                     | 80%                                     | 78%                                   | 0.784               |
| At least 4 life time sex partners            | 39%                                   | 29%                                     | 25%                                     | 18%                                     | 14%                                   | <0.001              |
| <b>Biological risk factors</b>               |                                       |                                         |                                         |                                         |                                       |                     |
| HIV prevalence                               | 48%                                   | 43%                                     | 41%                                     | 37%                                     | 33%                                   | <0.001              |
| STI prevalence                               | 20%                                   | 15%                                     | 14%                                     | 13%                                     | 12%                                   | <0.001              |
| HSV prevalence                               | 79%                                   | 74%                                     | 71%                                     | 70%                                     | 68%                                   | <0.001              |

<sup>†</sup>Kruskal-Wallis test was used

**Table 2:** Multivariate logistic regression: Odds Ratios (OR) and 95% confidence intervals (CI) for HIV infection

|                                                   | Prevalence (%) | UNIVARIATE ANALYSIS |         | MULTIVARIATE ANALYSIS |         |
|---------------------------------------------------|----------------|---------------------|---------|-----------------------|---------|
|                                                   |                | OR (95% CI)         | p-value | OR (95% CI)           | p-value |
| <b>Age (years)</b>                                |                |                     |         |                       |         |
| <25 year                                          | 41             | 1                   |         | 1                     |         |
| 25-29 years                                       | 21             | 1.98 (1.66,2.38)    | <0.001  | 1.52 (1.23,1.87)      | <0.001  |
| 30-34 years                                       | 16             | 1.60 (1.32,1.95)    | <0.001  | 1.19 (0.94,1.50)      | 0.142   |
| 35 plus                                           |                | 0.70 (0.58,0.85)    | <0.001  | 0.50 (0.40,0.63)      | <0.001  |
| <b>Age at first sex (years)</b>                   |                |                     |         |                       |         |
| <15 year (1 <sup>st</sup> quintile)               | 20             | 1.87 (1.47,2.36)    | <0.001  | 1.96 (1.53,2.51)      | <0.001  |
| 15-16 years (2 <sup>nd</sup> quintile)            | 20             | 1.50 (1.17,1.90)    | 0.001   | 1.61 (1.25,2.08)      | <0.001  |
| 17-18 years (3 <sup>rd</sup> quintile)            | 20             | 1.41 (1.13,1.76)    | 0.002   | 1.49 (1.19,1.87)      | 0.001   |
| 19-20 years (4 <sup>th</sup> quintile)            | 20             | 1.16 (0.87,1.54)    | 0.316   | 1.18 (0.89,1.59)      | 0.251   |
| 21+ (5 <sup>th</sup> quintile)                    | 20             | 1                   |         | 1                     |         |
| <b>At least high school education</b>             |                |                     |         |                       |         |
| Yes                                               | 26             | 1                   |         | 1                     |         |
| No                                                | 74             | 1.21 (1.04,1.41)    | 0.010   | 1.37 (1.15,1.62)      | <0.001  |
| <b>English spoken at home</b>                     |                |                     |         |                       |         |
| Yes                                               | 5              | 1                   |         | -                     |         |
| No                                                | 95             | 1.91 (1.53,2.39)    | <0.001  | -                     |         |
| <b>Religion</b>                                   |                |                     |         |                       |         |
| Other                                             | 9              | 1                   |         |                       |         |
| Christian                                         | 91             | 1.34 (1.06,1.71)    | 0.015   | -                     |         |
| <b>Number of lifetime sex partners</b>            |                |                     |         |                       |         |
| One                                               | 25             | 1                   |         | 1                     |         |
| Two                                               | 28             | 2.49 (2.01,3.10)    | <0.001  | 1.73 (1.37,2.20)      | <0.001  |
| Three                                             | 21             | 4.35 (3.47,5.44)    | <0.001  | 2.82 (2.20,3.62)      | <0.001  |
| Four or more                                      | 26             | 6.65 (5.35,8.26)    | <0.001  | 4.09 (3.20,5.22)      | <0.001  |
| <b>Cohabitation status</b>                        |                |                     |         |                       |         |
| Married/living w/ a sexual partner                | 15             | 1                   |         | 1                     |         |
| Not married/not living w/ a sexual partner        | 85             | 7.02 (5.20,9.47)    | <0.001  | 4.32 (3.11,6.00)      | <0.001  |
| <b>Have you ever had vaginal sex with condom?</b> |                |                     |         |                       |         |
| No                                                | 30             | 1                   |         |                       |         |



|                                             |    |                  |        |                   |        |
|---------------------------------------------|----|------------------|--------|-------------------|--------|
| Yes                                         | 70 | 1.40 (1.21,1.63) | <0.001 | -                 |        |
| <b>Using any contraception</b> <sup>1</sup> |    |                  |        |                   |        |
| Yes                                         | 78 | 1                |        |                   |        |
| No                                          | 22 | 1.36 (1.16,1.60) | <0.001 | -                 |        |
| <b>HSV diagnosis</b>                        |    |                  |        |                   |        |
| No                                          | 27 | 1                |        | 1                 |        |
| Yes                                         | 73 | 7.20 (5.88,8.82) | <0.001 | 6.19 (4.98,7.70)  | <0.001 |
| <b>STI diagnosis</b> <sup>2</sup>           |    |                  |        |                   |        |
| No                                          | 84 | 1                |        | 1                 |        |
| Yes                                         | 16 | 1.34 (1.12,1.61) | 0.001  | 1.24 (1.02, 1.51) | 0.038  |

<sup>1</sup>any of the following: male condom, female condom, pills, injectables, spermicides, withdrawal, long term (partner vasectomy, tubal ligation) other.

<sup>2</sup>*Chlamydia*, gonorrhoea, syphilis or *trichomonas vaginalis*

**Table 3:** Estimated crude incidence rates and hazard ratios for time to HIV by the quintiles of age at first sex

|                                 | Crude incidence rate per 100 PY (95% CI) | Unadjusted HR (95% CI) | p-value | Adjusted HR (95% CI) | p-value |
|---------------------------------|------------------------------------------|------------------------|---------|----------------------|---------|
| <b>Age at first sex (years)</b> |                                          |                        |         |                      |         |
| <15                             | 12.0 (8.0,18.0)                          | 1.97 (1.07,3.63)       | 0.029   | 1.78 (0.96,3.29)     | 0.066   |
| 15-16                           | 7.2 (5.7,9.0)                            | 1.11 (0.69,1.80)       | 0.664   | 0.90 (0.53,1.46)     | 0.633   |
| 17-18                           | 6.1 (4.1,9.0)                            | 0.95 (0.53,1.69)       | 0.851   | 0.82 (0.45,1.47)     | 0.496   |
| 19-20                           | 5.1 (2.9,9.0)                            | 0.78 (0.39,1.60)       | 0.503   | 0.72 (0.35,1.67)     | 0.365   |
| 21 +                            | 6.4 (4.2,9.8)                            | 1                      |         | 1                    |         |

<sup>1</sup>adjusted for age, number of lifetime sex partners, cohabitation status, level of education, ever used condom with vaginal sex

**Table 4:** Estimated PAR (95% CI) for risk factors for the prevalence and incidence of HIV infection in MIRA Trial

| Modifiable risk factors                      | PAR (95% CI) <sup>†</sup><br>(prevalence of HIV infection) | PAR (95% CI) <sup>†</sup><br>(incidence of HIV infection) |
|----------------------------------------------|------------------------------------------------------------|-----------------------------------------------------------|
| <b>Combined effect<sup>††</sup></b>          | <b>0.85 (0.84,0.87)</b>                                    | <b>0.77 (0.72,0.82)</b>                                   |
| Age at first sex (<15)                       | 0.26 (0.21-0.31)                                           | 0.17 (0.10,0.21)                                          |
| Less than high school <sup>‡</sup>           | 0.13 (0.10,0.17)                                           | N/A <sup>‡‡</sup>                                         |
| Age at first sex<br>+ less than high school  | <b>0.32 (0.27,0.38)</b>                                    | -                                                         |
| Not cohabiting                               | 0.39 (0.35,0.43)                                           | 0.54 (0.46,0.62)                                          |
| <b>Number of life time male sex partners</b> |                                                            |                                                           |
| Two                                          | 0.12 (0.11,0.13)                                           | 0.11 (0.09,0.15)                                          |
| Three                                        | 0.20 (0.18,0.21)                                           | 0.13 (0.11,0.17)                                          |
| Four or more                                 | 0.41 (0.39,0.43)                                           | 0.16 (0.13,0.20)                                          |
| <b>Biological risk factors</b>               |                                                            |                                                           |
| Tested positive for STI <sup>□</sup>         | 0.05 (0.04,0.06)                                           | 0.03 (0.02,0.05)                                          |
| HSV 2                                        | 0.82 (0.80,0.83)                                           | 0.21 (0.14,0.31)                                          |

<sup>†</sup> Age adjusted

<sup>††</sup> Assumes all the risk factors removed from the target population

<sup>‡</sup> Less than 12 years of education;

<sup>‡‡</sup> Level of education was not determined to be significant predictor of HIV seroconversion

<sup>□</sup> *Chlamydia*, gonorrhoea, syphilis or *Trichomonas vaginalis* at screening

1  
2  
3  
4  
5  
6  
7  
8  
9  
10  
11  
12  
13  
14  
15  
16  
17  
18  
19  
20  
21  
22  
23  
24  
25  
26  
27  
28  
29  
30  
31  
32  
33  
34  
35  
36  
37  
38  
39  
40  
41  
42  
43  
44  
45  
46  
47  
48  
49  
50  
51  
52  
53  
54  
55  
56  
57  
58  
59  
60

For peer review only

**Figure 1:** Time to HIV seroconversion by the quintiles of age at sexual debut

STROBE Statement—Checklist of items that should be included in reports of *cohort studies*

|                              | Item No | Recommendation                                                                                                                                                                                                                                                                                                                                           |
|------------------------------|---------|----------------------------------------------------------------------------------------------------------------------------------------------------------------------------------------------------------------------------------------------------------------------------------------------------------------------------------------------------------|
| <b>Title and abstract</b>    | 1       | (a) Indicate the study's design with a commonly used term in the title or the abstract (page 1)<br>(b) Provide in the abstract an informative and balanced summary of what was done and what was found (page 1)                                                                                                                                          |
| <b>Introduction</b>          |         |                                                                                                                                                                                                                                                                                                                                                          |
| Background/rationale         | 2       | Explain the scientific background and rationale for the investigation being reported (Page 1-2)                                                                                                                                                                                                                                                          |
| Objectives                   | 3       | State specific objectives, including any prespecified hypotheses (page 3)                                                                                                                                                                                                                                                                                |
| <b>Methods</b>               |         |                                                                                                                                                                                                                                                                                                                                                          |
| Study design                 | 4       | Present key elements of study design early in the paper (pages 4-6)                                                                                                                                                                                                                                                                                      |
| Setting                      | 5       | Describe the setting, locations, and relevant dates, including periods of recruitment, exposure, follow-up, and data collection (page 4)                                                                                                                                                                                                                 |
| Participants                 | 6       | (a) Give the eligibility criteria, and the sources and methods of selection of participants. Describe methods of follow-up (N/A)<br>(b) For matched studies, give matching criteria and number of exposed and unexposed (N/A)                                                                                                                            |
| Variables                    | 7       | Clearly define all outcomes, exposures, predictors, potential confounders, and effect modifiers. Give diagnostic criteria, if applicable (4-6)                                                                                                                                                                                                           |
| Data sources/<br>measurement | 8*      | For each variable of interest, give sources of data and details of methods of assessment (measurement). Describe comparability of assessment methods if there is more than one group (4-6)                                                                                                                                                               |
| Bias                         | 9       | Describe any efforts to address potential sources of bias (page 12)                                                                                                                                                                                                                                                                                      |
| Study size                   | 10      | Explain how the study size was arrived at (N/A)                                                                                                                                                                                                                                                                                                          |
| Quantitative variables       | 11      | Explain how quantitative variables were handled in the analyses. If applicable, describe which groupings were chosen and why (4-5)                                                                                                                                                                                                                       |
| Statistical methods          | 12      | (a) Describe all statistical methods, including those used to control for confounding (Pages 4-6)<br>(b) Describe any methods used to examine subgroups and interactions (N/A)<br>(c) Explain how missing data were addressed (5)<br>(d) If applicable, explain how loss to follow-up was addressed (N/A)<br>(e) Describe any sensitivity analyses (N/A) |
| <b>Results</b>               |         |                                                                                                                                                                                                                                                                                                                                                          |
| Participants                 | 13*     | (a) Report numbers of individuals at each stage of study—eg numbers potentially eligible, examined for eligibility, confirmed eligible, included in the study, completing follow-up, and analysed (N/A)<br>(b) Give reasons for non-participation at each stage (N/A)<br>(c) Consider use of a flow diagram (N/A)                                        |
| Descriptive data             | 14*     | (a) Give characteristics of study participants (eg demographic, clinical, social) and information on exposures and potential confounders (6)<br>(b) Indicate number of participants with missing data for each variable of interest (5)<br>(c) Summarise follow-up time (eg, average and total amount) (N/A)                                             |
| Outcome data                 | 15*     | Report numbers of outcome events or summary measures over time (6)                                                                                                                                                                                                                                                                                       |
| Main results                 | 16      | (a) Give unadjusted estimates and, if applicable, confounder-adjusted estimates and their precision (eg, 95% confidence interval). Make clear which confounders were adjusted for and why they were included (6-7)                                                                                                                                       |

|    |                          |                                                                                           |
|----|--------------------------|-------------------------------------------------------------------------------------------|
| 1  |                          | (b) Report category boundaries when continuous variables were categorized (pages          |
| 2  |                          | 5-6 and page 7                                                                            |
| 3  |                          | (c) If relevant, consider translating estimates of relative risk into absolute risk for a |
| 4  |                          | meaningful time period (N/A)                                                              |
| 5  |                          |                                                                                           |
| 6  | Other analyses           | 17 Report other analyses done—eg analyses of subgroups and interactions, and              |
| 7  |                          | sensitivity analyses (6)                                                                  |
| 8  |                          |                                                                                           |
| 9  | <b>Discussion</b>        |                                                                                           |
| 10 | Key results              | 18 Summarise key results with reference to study objectives (pages 12-13)                 |
| 11 | Limitations              | 19 Discuss limitations of the study, taking into account sources of potential bias or     |
| 12 |                          | imprecision. Discuss both direction and magnitude of any potential bias (pages 13-        |
| 13 |                          | 14)                                                                                       |
| 14 |                          |                                                                                           |
| 15 | Interpretation           | 20 Give a cautious overall interpretation of results considering objectives, limitations, |
| 16 |                          | multiplicity of analyses, results from similar studies, and other relevant evidence       |
| 17 |                          | (page 12-13)                                                                              |
| 18 |                          |                                                                                           |
| 19 | Generalisability         | 21 Discuss the generalisability (external validity) of the study results (12)             |
| 20 |                          |                                                                                           |
| 21 | <b>Other information</b> |                                                                                           |
| 22 | Funding                  | 22 Give the source of funding and the role of the funders for the present study and, if   |
| 23 |                          | applicable, for the original study on which the present article is based (14)             |
| 24 |                          |                                                                                           |
| 25 |                          |                                                                                           |

\*Give information separately for exposed and unexposed groups.

**Note:** An Explanation and Elaboration article discusses each checklist item and gives methodological background and published examples of transparent reporting. The STROBE checklist is best used in conjunction with this article (freely available on the Web sites of PLoS Medicine at <http://www.plosmedicine.org/>, Annals of Internal Medicine at <http://www.annals.org/>, and Epidemiology at <http://www.epidem.com/>). Information on the STROBE Initiative is available at <http://www.strobe-statement.org>.

1  
2  
3  
4  
5  
6  
7  
8  
9  
10  
11  
12  
13  
14  
15  
16  
17  
18  
19  
20  
21  
22  
23  
24  
25  
26  
27  
28  
29  
30  
31  
32  
33  
34  
35  
36  
37  
38  
39  
40  
41  
42  
43  
44  
45  
46  
47  
48  
49  
50  
51  
52  
53  
54  
55  
56  
57  
58  
59  
60

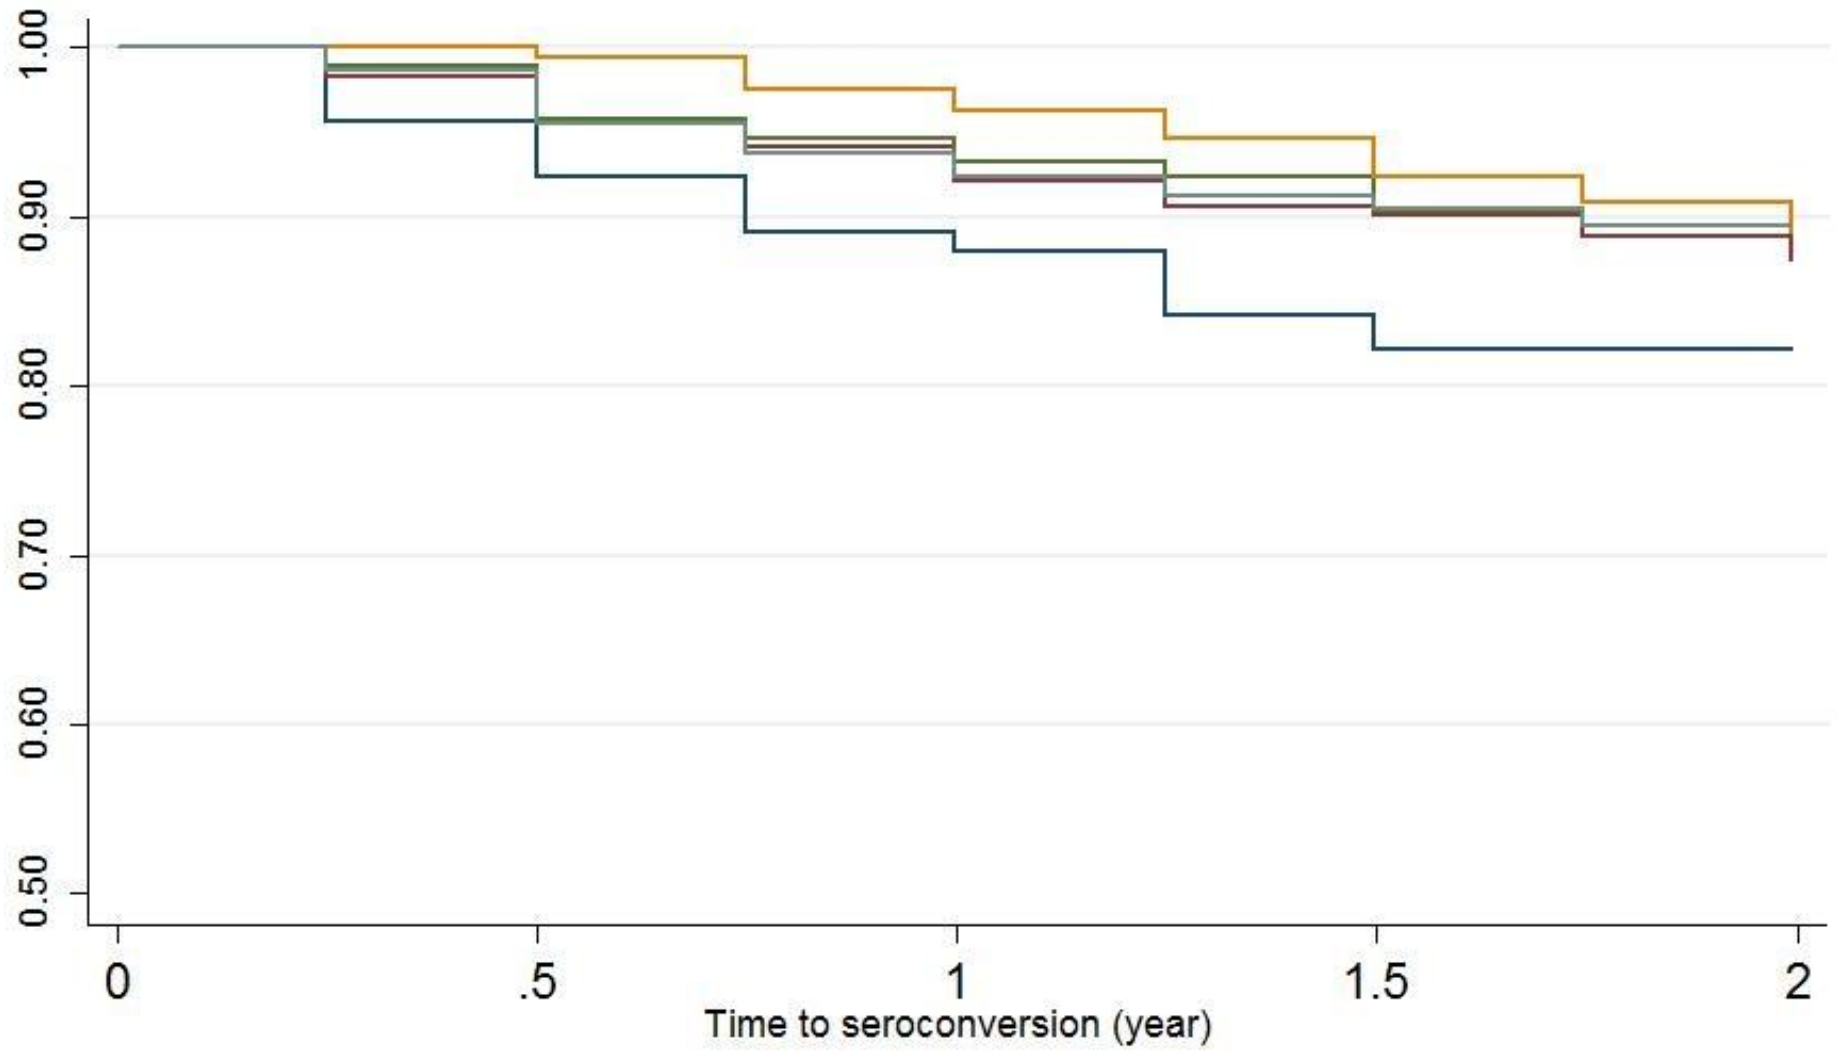

Supplement: bmjopen-2011-000285.draft_revisions.pdf [file bmjopen-2011-000285.draft_revisions.pdf]
